1        ***Russula* (Basidiomycota, Russulales, Russulaceae) subsect. *Roseinae* “down under”**

2

3        Bart Buyck, Institut de Systématique, Evolution, Biodiversité (ISYEB), Muséum national  
4        d'histoire naturelle, CNRS, Sorbonne Université, EPHE, Université des Antilles, CP 39, 57  
5        rue Cuvier, 75005 Paris, France [bart.buyck@mnhn.fr]

6        Egon Horak, Schlossfeld 17, A-6020 Innsbruck, Austria [sporax@gmx.net]

7        Jerry A. Cooper, Manaaki Whenua - Landcare Research, P.O. Box 69040, Lincoln 7640, New  
8        Zealand [CooperJ@landcareresearch.co.nz]

9        Yu Song, School of Biological Science & Engineering, Shaanxi University of Technology,  
10        Hanzhong, 723000 China [songyucanada@foxmail.com]

11

12        Bart Buyck: corresponding author

13

14        Abstract. The present contribution presents species of *Russula* subsect. *Roseinae* Sarnari from  
15        the southern hemisphere. *Russula incrustata* Buyck, sp. nov. and *R. koniamboensis* Buyck, sp.  
16        nov. are described from New Caledonia, *R. purpureotincta* R. F. R. McNabb from New  
17        Zealand is redescribed in detail and two secotioid species, *R. albobrunnea* T. Lebel from  
18        Australia and *R. kermesina* (R. F. R. McNabb) T. Lebel from New Zealand are shown to be  
19        the first known secotioid taxa in *Roseinae*. The systematic placement and importance of these  
20        southern taxa is discussed.

21        Key words: Australia, biogeography, New Caledonia, New Zealand, *Nothofagus*, phylogeny,  
22        *Russula* crown clade

23

24        **Introduction**

25

26        Extant species of *Russula* subsect. *Roseinae* have been suggested to have diverged about three  
27        to one million years ago (Looney et al., 2020) and are part of the most diverse, major lineage  
28        of the genus in the northern hemisphere, viz. the Crown clade of subgenus *Russula* (Buyck et  
29        al. 2018). Species in subsect. *Roseinae* are morphologically characterized by the pink, red or  
30        whitish to yellowish pileus, the white to pale cream spore print, the predominantly mild taste,  
31        the context and lamellae turning eosin red with sulfovanillin and the lack of typical

32 gloeocystidia in pileipellis and context. In addition, the involved species possess “primordial  
33 hyphae”, i.e. hyphal terminations with acid-resistant incrustations (see Romagnesi 1967: 58-  
34 59) which are generally emerging above the other hyphal extremities. All *Roseinae* also have  
35 inflated cells in the lower pileipellis composing a more or less well-developed  
36 pseudoparenchymatic layer from which the hyphal terminations originate.

37 In Europe, *Russula* subsect. *Roseinae* is represented by merely two widely accepted  
38 species, *R. velutipes* Velen. (syn.: *R. rosea* Quél.) and *R. minutula* Velen., but the subsection  
39 is much more diverse in other regions of the northern hemisphere. Indeed, recent taxonomic  
40 studies on *Roseinae* report seven described North American species and an additional six  
41 species that are still not formally described (Looney et al., 2020; Manz et al., 2021): *R.*  
42 *cordata* Looney, *R. rheubarbarina* Looney, *R. rubellipes* Fatto, *R. peckii* Singer, *R.*  
43 *pseudopeckii* Fatto and one undescribed relative, *R. cardinalis* Looney, *R. albida* Peck (syn.:  
44 *R. purpureomaculata* Shaffer) with two undescribed American relatives, one undescribed *R.*  
45 *minutula* aff, as well as two undescribed species in the ‘*magnarosea*’-lineage). In addition,  
46 four more species of *Roseinae* were described from the Central American montane forests in  
47 Western Panama (Manz et al., 2021: *R. cornicolor* Manz & F. Hampe, *R. zephyrovelutipes*  
48 Manz & F. Hampe, *R. oreomunneae* Manz, F. Hampe & Corrales and *R. cynorhodon* Manz &  
49 F. Hampe), now bringing the total of putative American species in *Roseinae* (s. l.) to 17 taxa.  
50 These same authors (Manz et al. 2021) confirmed or suggested the position of the following  
51 thirteen Asian phylogenetic species in *Roseinae*: *R. dhakuriana* K. Das, J. R. Sharma & S. L.  
52 Mill., *R. hakkae* G. J. Li, H. A. Wen & R. L. Zhao, *R. kewzingensis* K. Das, D. Chakr. &  
53 Buyck with one undescribed relative, *R. guangxiensis* G. J. Li, H. A. Wen & R. L. Zhao with  
54 one undescribed sister species, two undescribed Asian relatives to *R. velutipes*, two more  
55 undescribed Asian species close to *R. pseudopeckii*, two undescribed Asian relatives to *R.*  
56 *peckii*, as well as one sister species to *R. cynorhodon*.

57 *Russula rimosa* Murrill, again a North American species, is only known from the type  
58 collection and was classified in subsect. *Roseinae* based on its morphology (Adamčík &  
59 Buyck, 2012), but so far, any attempt of sequencing the DNA of this species has been  
60 unsuccessful. Sequence data are also needed for the Indian *R. sharmae* K. Das, Atri & Buyck,  
61 another potential member of subsect. *Roseinae* based on its microscopic features, but it is  
62 unusual in producing an almost yellowish spore print (Das et al., 2013). This brings the total  
63 of potential northern hemisphere *Roseinae* to 30 recognized species or about five times more  
64 than hardly a few years ago !

65

66 Looney et al. (2020) suggested a northern hemisphere distribution for *Roseinae* and inferred  
67 an Appalachian origin for the subsection in North America, followed by in situ diversification  
68 of these species in the Appalachian Mountains roughly since the mid-Miocene. Whereas  
69 published sequence data had already suggested the existence of several potential *Roseinae* in  
70 Oceania or Australasia (Buyck et al., 2018; Lebel & Tonkin, 2007; Cooper & Leonard, 2014;  
71 Cooper, 2021), none of these southern species has ever been discussed in the literature. The  
72 aim of this study is to identify the actual taxonomic status and phylogenetic position of these  
73 southern hemisphere relatives.

74

75

## 76 **Materials and Methods**

77

### 78 *Morphological study*

79 Fresh fruiting bodies were photographed in the field and in the lab, descriptive notes and  
80 spore prints were taken and tissue samples transferred in CTAB solution for subsequent  
81 sequencing.

82 Micromorphological characters were studied using a Nikon Eclipse E400 microscope under  
83 oil-immersion lens at a magnification of x1000. All drawings of microscopical structures were  
84 made with a ‘camera lucida’ using a Nikon Y-IDT drawing attachment at a projection scale of  
85 x2400. Contents of hymenial cystidia and pileocystidia in the figures are indicated  
86 schematically, with the exception of a few elements where contents are indicated as observed  
87 in Congo red preparations from dried material. Spores were observed in Melzer’s reagent. All  
88 other microscopic observations were made in ammoniacal Congo red, after a short aqueous  
89 KOH pre-treatment near boiling temperature to improve tissue dissociation through gelatinous  
90 matrix dissolution. All tissues were also examined for the presence of ortho- or  
91 metachromatic contents or incrustations in Cresyl blue as explained in Buyck (1989).

92

### 93 *DNA extraction, PCR and sequencing*

94 Fungal genomic DNA was isolated from fresh material stored in cetyl-trimethyl-  
95 ammonium bromide buffer (CTAB 1x). Five loci were tentatively amplified: 900–1400 base  
96 pairs of the ribosomal nuclear large subunit (nuLSU) using primers LROR and LR7; 600

97 base pairs of the ribosomal mitochondrial small subunit (mitSSU) with primers MS1 and MS2  
98 (White et al. 1990); 1300 base pairs of the largest subunit of the RNA polymerase II (RPB1)  
99 with primers RPB1-AF (Stiller & Hall, 1997) and RPB1-CR (Matheny et al., 2009); 700 base  
100 pairs of the second largest subunit of the RNA polymerase II (RPB2) using primers RPB2-6F  
101 and fRPB2-7cR (Liu & Hall, 2004) and 900 base pairs of the translation elongation factor 1-  
102 alpha (TEF1) using primers EF1-F and EF1-R (Morehouse et al., 2003). Amplifications were  
103 performed under the conditions and with the reagents of the Taq PCR core kit (QIAGEN,  
104 Inc., Valencia, California, USA). Sequencing used the amplification primers, reagents and  
105 conditions of the BigDye Terminator v3.1 Cycle sequencing Kit and an automated capillary  
106 sequencer ABI 3700 DNA analyzer (Perkin Elmer, Applied Biosystems, Foster City, CA,  
107 USA). Most sequences for these various loci were obtained for *R. incrustata* and have already  
108 been deposited in GenBank (as *R. roseinae* sp. *VH-2016n strain 735/BB 09.172*) and  
109 published in the context of a *Russula* world phylogeny (Buyck et al. 2018). The newly  
110 published sequences have all been deposited in GenBank ([www.ncbi.nlm.nih.gov](http://www.ncbi.nlm.nih.gov)), viz. ITS  
111 (OM397456-OM397459) and *tef1* (OM365994-OM365996, OM370807) for both new  
112 species from New Caledonia, eight ITS sequences for *R. purpureotincta* R.F.R.McNabb  
113 (OR348209, OR348217, OR348277-OR348281), including one from the holotype, and a  
114 single ITS sequence for *R. kermesina* (R.F.R.McNabb) T.Lebel (OR348284).

115

### 116 *Phylogenetic analysis*

117 Separate phylogenetic analyses based on ITS and *tef1* performed with Maximum Likelihood  
118 method were chosen in function of available sequence data for the southern species. The  
119 sampling of northern hemisphere taxa is based on Manz et al. (2021). Each dataset was  
120 automatically aligned by MAFFT v 7.427 (Kato & Standley, 2013), then manually adjusted  
121 and trimmed with BioEdit v7.0.9 (Hall, 1999). The final ITS alignment consisted of 70  
122 sequences and comprised 750 bp; the *tef1* alignment was 921 bp long (excluding introns) and  
123 comprised 41 sequences, *Russula emeticicolor* (Jul.Schäff.) Singer and *R. lilacea* QuéL.  
124 belonging to subsect *Lilaceinae* (Melzer & Zvára) Jul.Schäff. were chosen as the outgroup. A  
125 rapid bootstrapping (BS) algorithm of 1000 replicates was executed in RAxML 7.2.6  
126 (Stamatakis, 2006), followed by a heuristic ML search for the best tree using the  
127 GTRGAMMA model. All parameters in RAxML analysis were kept at default. Bootstrap  
128 value (BS) exceeding or equal to 70% was considered to represent significant support.

129

## 130 **Results**

### 131 *Phylogeny*

132 The ITS phylogeny (Fig. 1) comprises 68 sequences representative of taxa in *Roseinae* and  
133 two sequences of *Lilaceinae* chosen as out-group. Southern *Roseinae* are represented by six  
134 previously deposited sequences in GenBank and twelve newly generated sequences (see  
135 above). In this phylogeny, the three New Caledonian specimens of *R. koniamboensis* are  
136 placed sister with significant, although moderate support (MLbs=76%) to our second new  
137 species from New Caledonia, *R. incrustata*. Both New Caledonian species are again placed  
138 sister with full support (MLbs=100%) to a clade composed of all sequences of *R.*  
139 *purpureotincta* from New Zealand (one was previously deposited under the wrong name of *R.*  
140 *cremeoohracea* in GenBank). It is for the very first time that we also place two secotioid  
141 species in subsect. *Roseinae*: *R. kermesina* from New Zealand and *R. albobrunnea* from  
142 Australia. For both, only ITS sequence data are available and our analysis reveals that these  
143 two secotioid taxa are monophyletic with full support (MLbs=100%). We obtained no  
144 significant support to place this clade in relation to any other particular clade, but our  
145 phylogeny suggests close relationship with a clade composed of *R. pseudopeckii*, *R.*  
146 *zephyrovelutipes* and related taxa.

147 The *tefl* phylogeny (Fig. 2) comprises 41 sequences and places only the New Caledonian  
148 species as no *tefl* sequences are available for the other southern species. Whereas the exact  
149 relationships of both New Caledonian species with the other species in the subsection  
150 remained unresolved in the ITS phylogeny (fig. 1), the *tefl* phylogeny offers now strong  
151 support (MLbs=97%) to put both New Caledonian sister to the /cardinalis lineage as delimited  
152 in Manz et al. (2021). The latter lineage comprises merely two species, viz. *R. cornicolor*  
153 associated with *Oreomunnea* Oerst. (fam. Juglandaceae) in Western Panama and *R. cardinalis*  
154 associated with *Quercus* L. in the Appalachian Smoky Mts of Tennessee, USA.

155 Considering the topologies obtained in our ITS and *tefl* analyses and those obtained in the  
156 abovementioned papers with multigene analyses (see introduction), it seems likely that  
157 southern hemisphere *Roseinae* occur in at least two different lineages within the subsection:  
158 the /cardinalis-lineage for the agaricoid species from New Caledonia and New Zealand, and a  
159 mixed American-Asian lineage for both secotioid taxa.

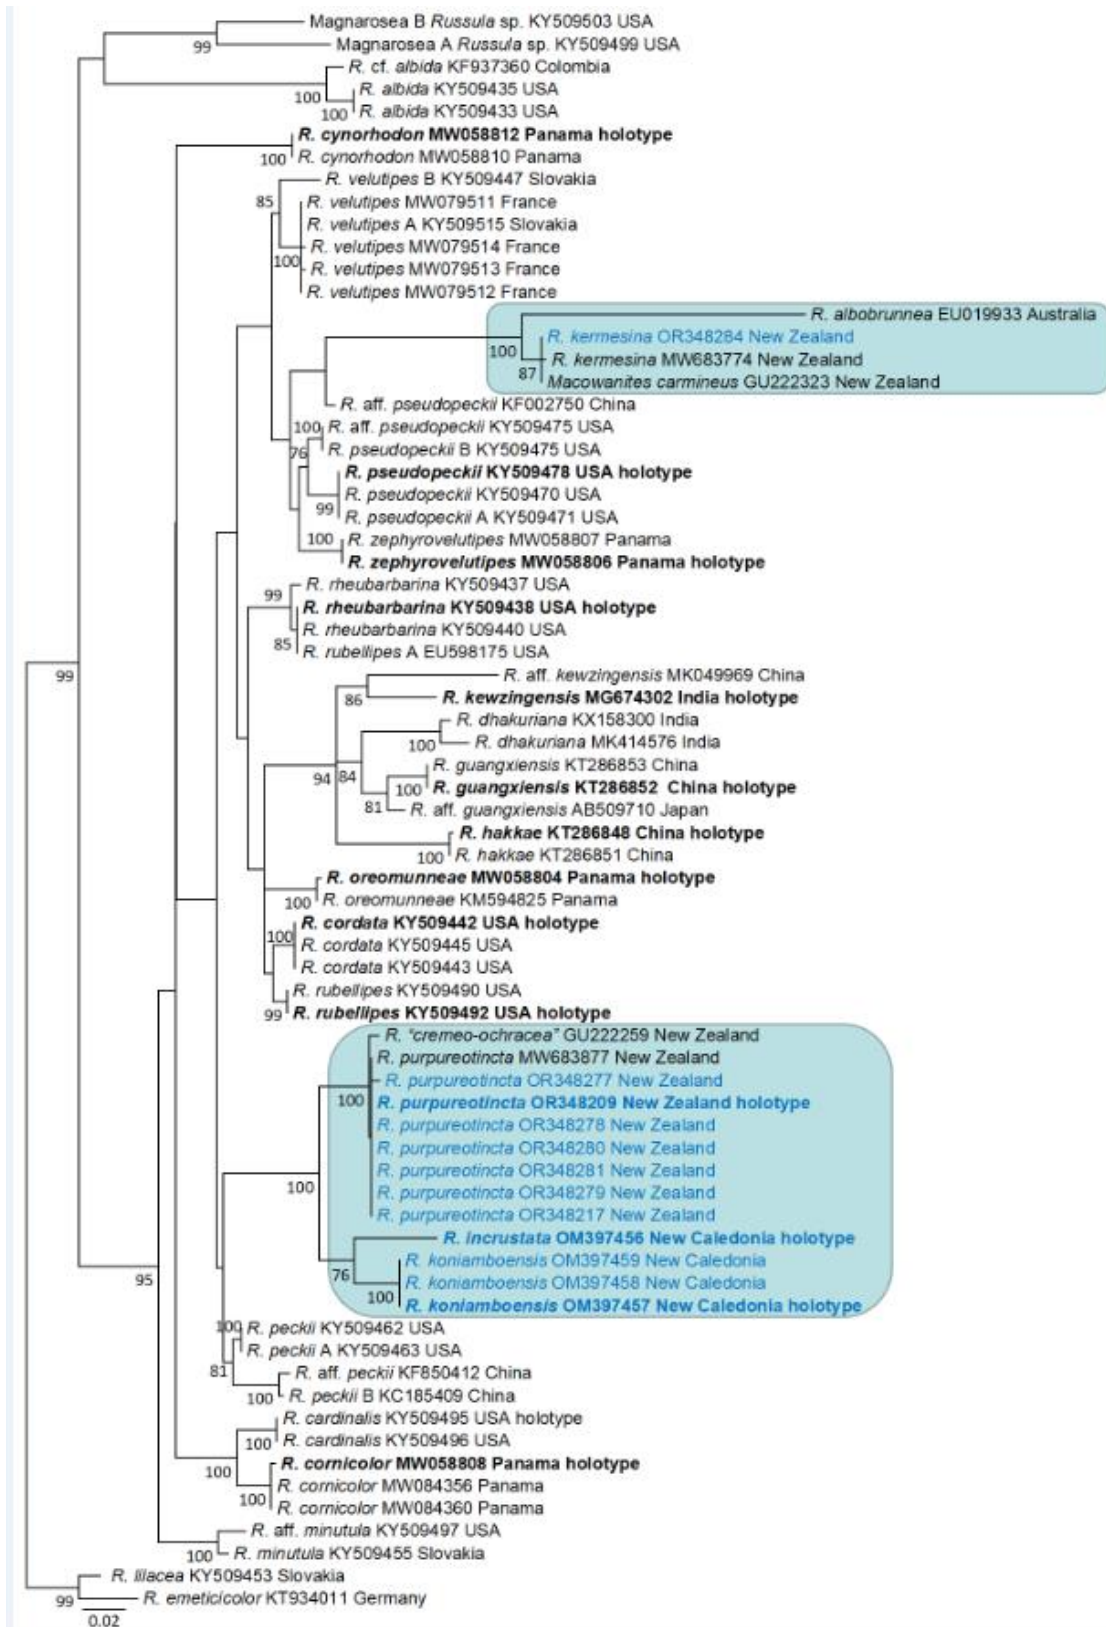

160

161 Fig. 1. — ITS phylogeny of *Russula* subsect *Roseinae*. Southern hemisphere species are

162 indicated by coloured rectangles. Type specimens are indicated in bold.

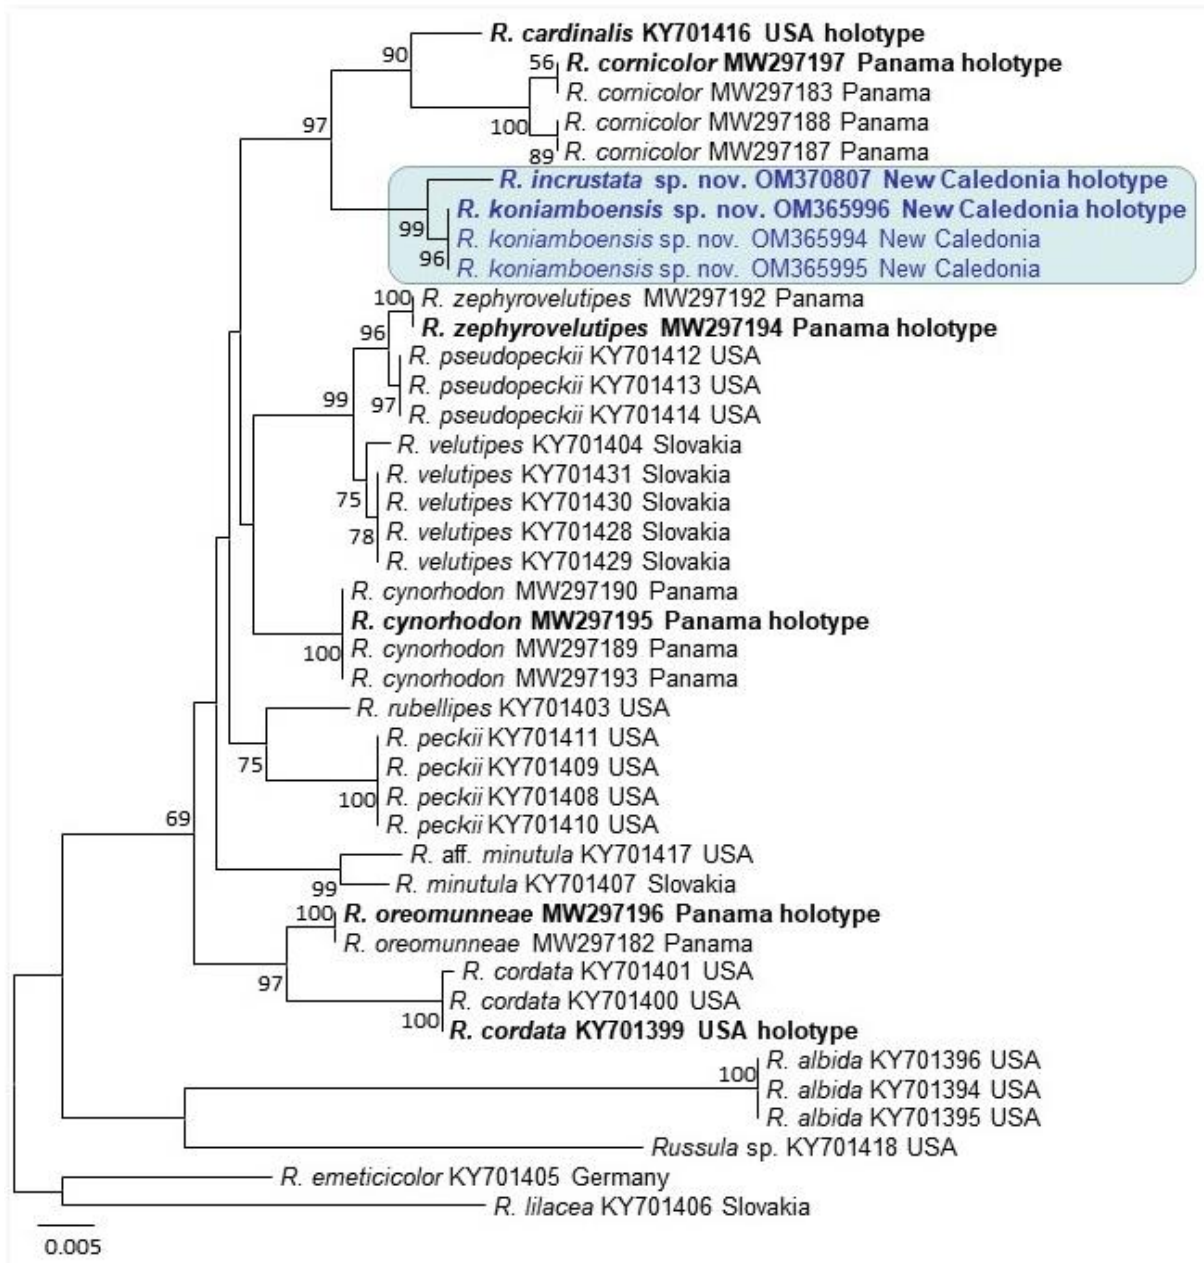

163

164 Fig. 2. — The *tef1* phylogeny of *Russula* subsect. *Roseinae* placing both New Caledonian  
165 species (blue rectangle). Type specimens are indicated in bold.

166

### 167 Taxonomy

168 In the below paragraphs we will provide descriptions for the two new New Caledonian  
169 species, as well as a description for the here newly reported collections for the related *R.*  
170 *purpureotincta* from New Zealand.

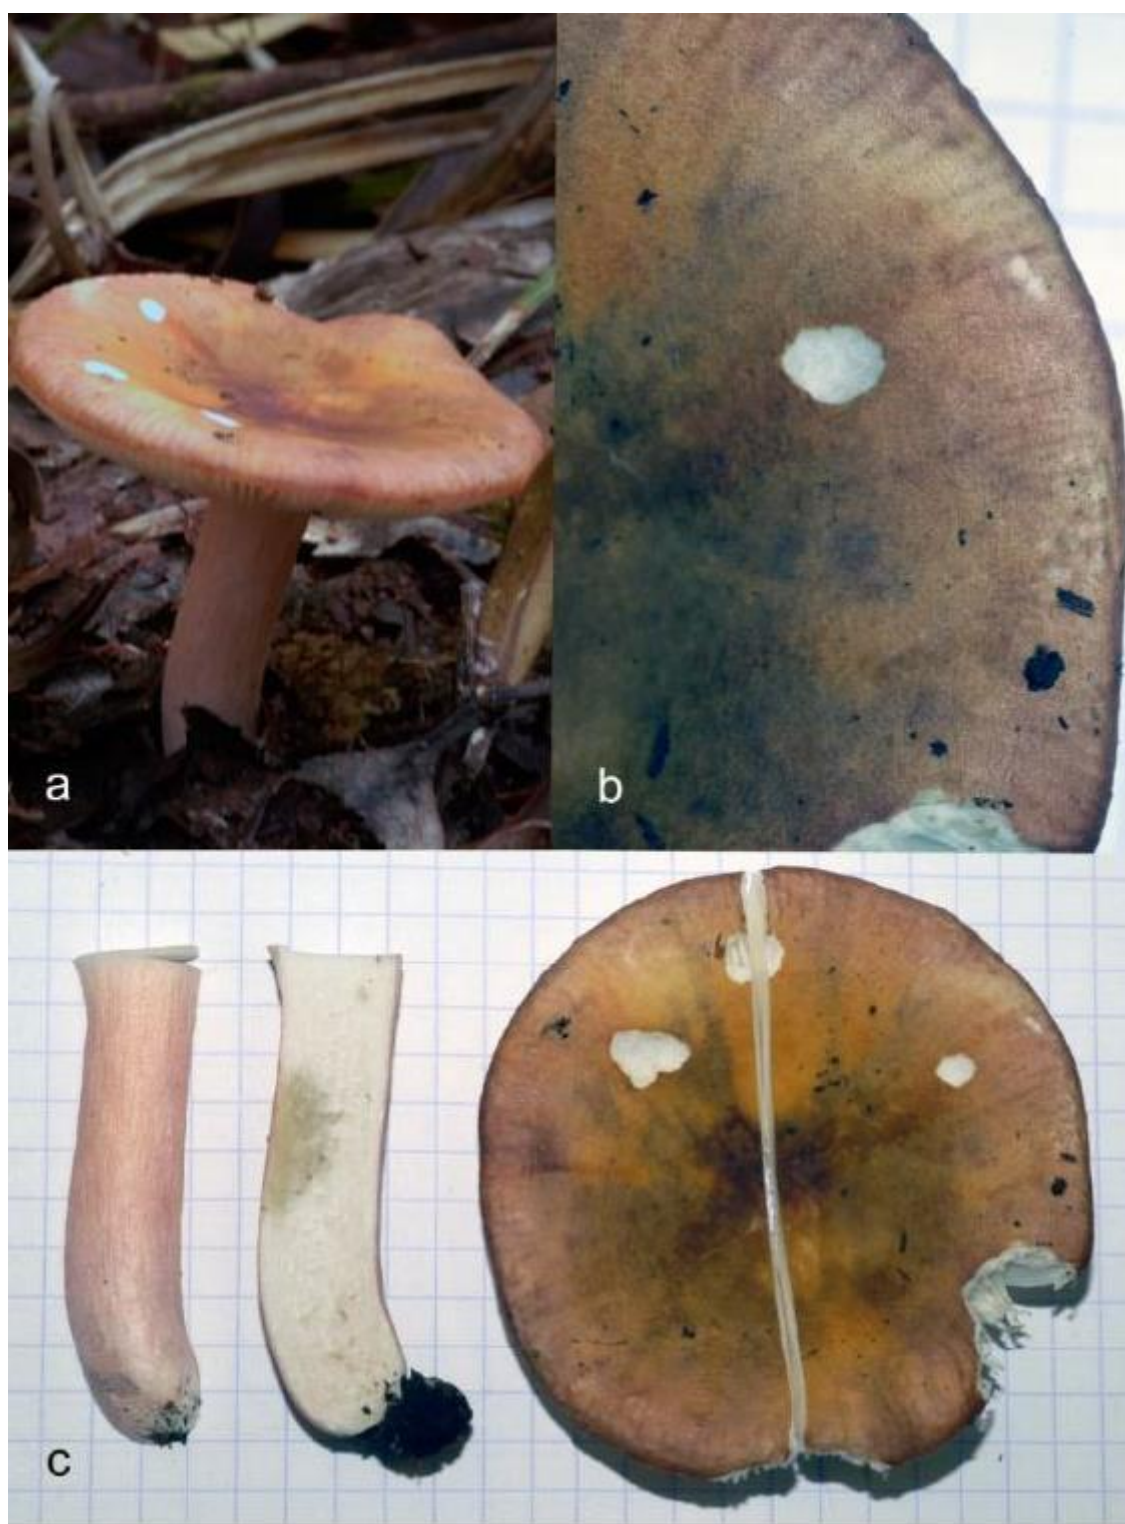

171

172 Fig. 3. — *Russula incrustata* Buyck, sp. nov. (holotype): Fresh basidiomata. a, in situ; b,  
173 detail of the pileus surface; c, view of pileus and stipe surface. Photo credit: B. Buyck.

174



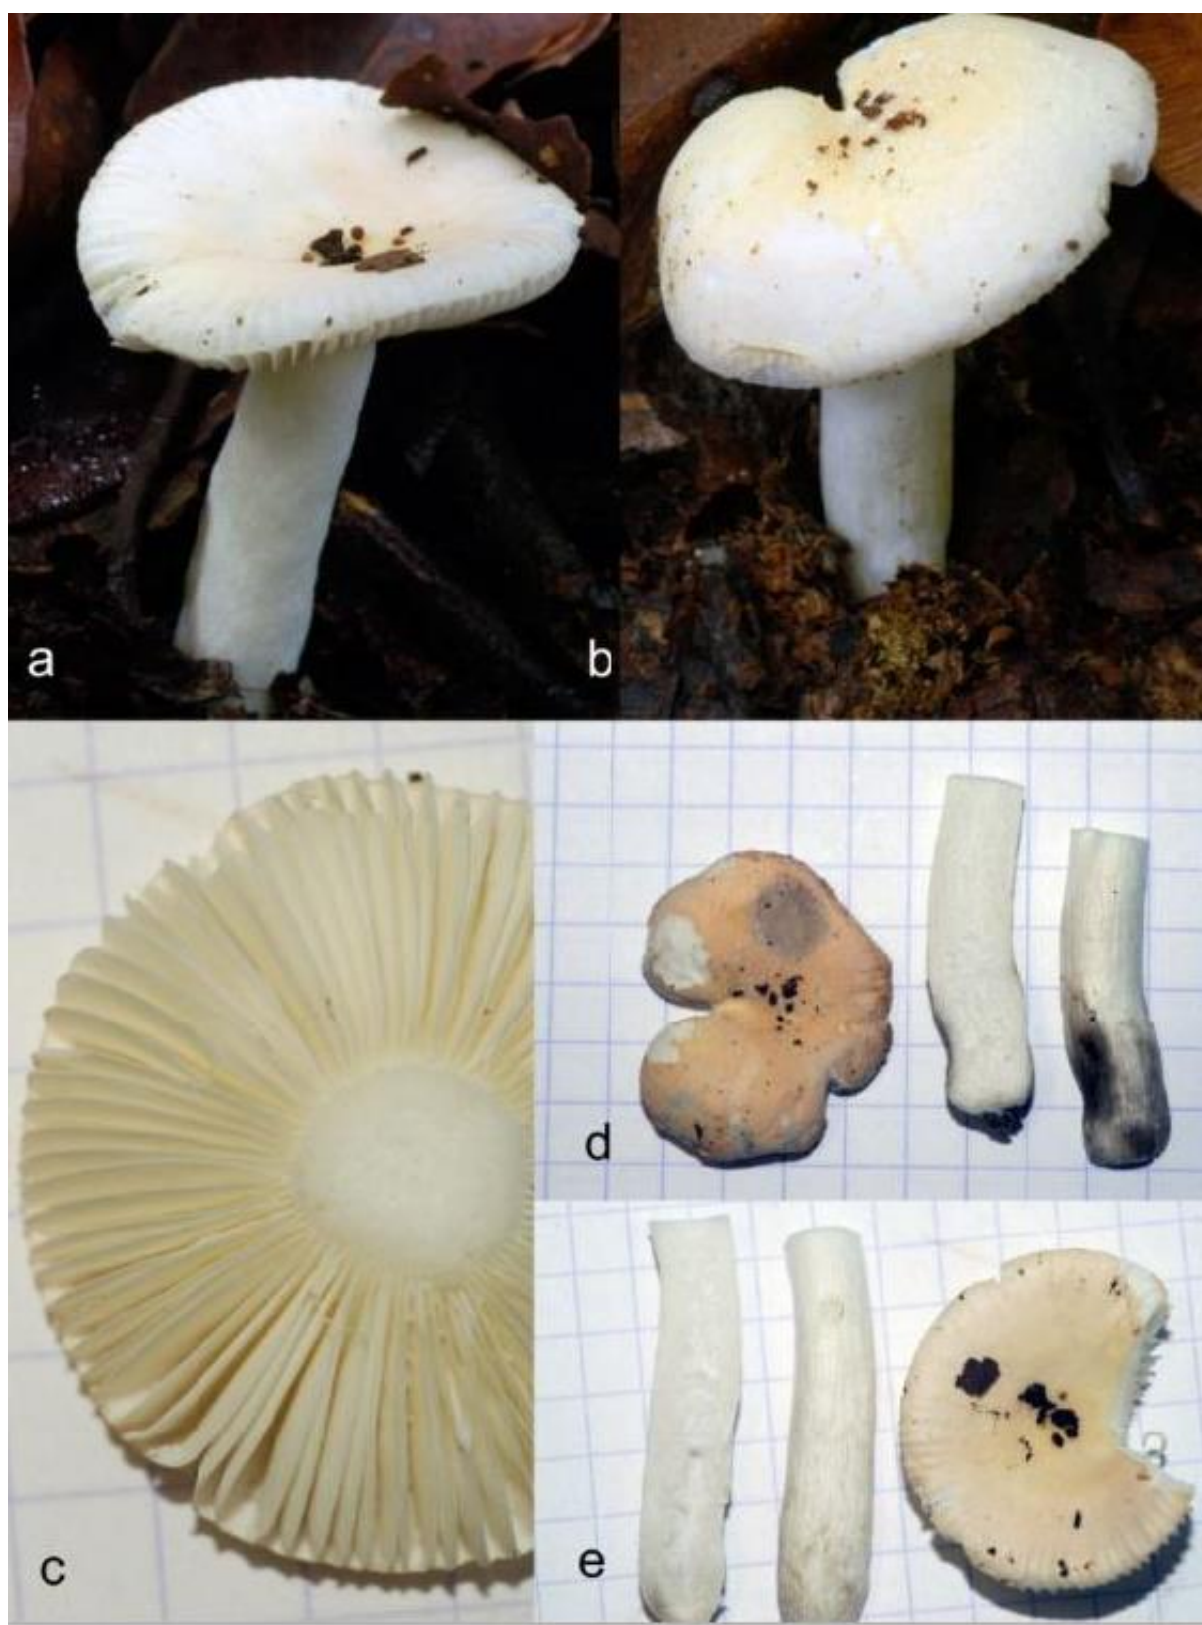

175

176 Fig. 4. — *Russula koniamboensis* Buyck, sp. nov. Fresh basidiomata. a-c, holotype; d-e,

177 730/BB09.170. Photo credits: B. Buyck

178

179 **1. *Russula incrustata* Buyck, *sp. nov.***

180 **Figs.: 3, 5-8, 9d**

181 Differs from *R. koniamboensis* Buyck, *sp. nov.* in the vividly colored pileus, pinkish stipe, the  
182 somewhat smaller spore size and its occurrence under endemic *Arillastrum gummiferum*.

183 Holotype. — NEW CALEDONIA: Les Bois du Sud, near blockhut, S22.171713- E166.760103, ca.  
184 300 m alt., on ultramafic soil in monodominant rain forest of endemic *Arillastrum gummiferum*  
185 (Brongn. & Gris) Pancher ex Baill. [fam. Myrtaceae], 27 March 2009, 735/BB 09.172 (PC0142414).

186 Mycobank. — xxxx

187 Genbank. — OM370807 (ITS), KU237588 (LSU), KU237436 (mitSSU), KU237873 (*rpb2*),  
188 KU238015 (*tef1*), KU237728 (*rpb1*)

189 Etymology. — the epithet refers to the distinct incrustations present on the cell walls of the lower  
190 pseudoparenchyma of the pileipellis and other parts of the context.

191

192 *Pileus*

193 Medium-sized, 64 mm diam., plane or very gently and widely depressed in the center,  
194 inconspicuously striate near margin; surface peeling 2/3 radius, dull, not hygrophanous, felty-  
195 velutinous, never viscid, not fragmenting in areolae or squamae but slightly concentrically  
196 pruinose, colour range from pale brown, orange, pink, lilac, purple or vinaceous, not paler in  
197 the center with age.

198 *Stipe*

199 51 x 11-12 mm, central, cylindrical; surface smooth, slightly longitudinally wrinkled, not  
200 pruinose, entirely pinkish but white at the extreme base, firm, context soft spongy without  
201 cavities, basal mycelium absent.

202 *Lamellae*

203 Equal in length, adnate, without anastomoses or forks, brittle, 8 mm high, off-white.

204 *Context*

205 Brittle, white, colour unchanging on injury or with age, about 6 mm thick in pileus above gill  
206 attachment to stipe, with FeSO<sub>4</sub> hardly changing color, merely faintly grey inside stipe and

207 weakly pinkish on stipe surface, insensitive to Guaiac reaction negative. Taste and odor not  
208 distinctive.

209 *Spore print*

210 White.

211

212 *Spores*

213 (6.46)6.89–**7.27**–7.65(7.92) x (5.42)5.67–**5.92**–6.17(6.46)  $\mu\text{m}$ , broadly ellipsoid, Q =  
214 (1.10)1.17–**1.23**–1.29(1.36); ornamentation subreticulate, composed of large, prominent,  
215 moderately distant, conical and strongly amyloid spines, up to 1.5  $\mu\text{m}$  high, connected by  
216 frequent fine lines into an incomplete network; suprahilar spot well–developed, varying from  
217 strongly amyloid to verruculose, grayish and poorly amyloid.

218 *Basidia*

219 30–40(–58)  $\times$  11–15  $\mu\text{m}$ , narrowly to broadly clavate, 4–spored with stout sterigmata;  
220 basidiola clavate.

221 *Subhymenium*

222 pseudoparenchymatic.

223 *Hymenial gloeocystidia*

224 On lamella sides mostly 50–74  $\times$  8–10  $\mu\text{m}$ , clavate to fusiform, frequently mucronate to  
225 appendiculate at apex, up to 10  $\mu\text{m}$  long, rarely obtuse rounded, originating in subhymenium  
226 and longer as basidia, walls up to 2(–2.5)  $\mu\text{m}$  thick; contents mainly restricted to some  
227 refringent inclusions at apex, not reacting to sulfovanillin, rarely with up to 5 secondary septa;  
228 cystidia near the lamellae edges smaller, up to 30  $\mu\text{m}$  long.

229 *Marginal cells*

230 Occupying most of the lamellar edges, sitting on 1–2 basal cells, mostly 13–29  $\times$  (3–)5–9  $\mu\text{m}$ ,  
231 very variable in shape, several reminding of the terminal cells in the suprapellis (but smaller),  
232 but usually with 1–4 diverticulate pointed to obtuse–rounded outgrowths.

233 *Pileipellis*

234 Two-layered, not distinctly delimited from the underlying context; subpellis composed of a  
235 40–60 µm thick, loose pseudoparenchyma composed of intertwined and strongly ramifying,  
236 ascending to erect, irregularly shaped cells, in the lower part with very distinct orthochromatic  
237 zebroid incrustations, larger inflated cells at the base up to 12(–15) µm wide, giving rise to  
238 smooth-walled 2–4(–5) narrower cells at the pileus surface; subterminal cells frequently  
239 branched, thin-walled, barrel-shaped or subcylindrical; terminal cells mostly longer in  
240 comparison, (8–)16–23(–39) × 2–4(6) µm, often undulated in outline, typically attenuating  
241 towards a minutely capitate apex or with one subapical lateral diverticulum. Primordial  
242 hyphae difficult to distinguish in shape from other extremities, recognizable at the terminal  
243 cell measuring 15–31 × 3–5 µm and filled with refringent, granular-heteromorphous contents  
244 in their very upper part. Cystidioid hyphae absent from subpellis and context. Oleiferous  
245 hyphae or hyphal fragments abundant in subpellis.

246 *Clamp connections*

247 absent.

248

249 *Notes:* *Russula incrustata* is a beautiful and colourful species that we found only once. There are no  
250 environmental sequences available for it, which could indicate that this taxon is rather rare. Perhaps its  
251 ectomycorrhizal association with the rare and endemic *Arrilastrum gummiferum* is the explanation. In  
252 the multigene phylogenetic analysis of worldwide *Russula* (Buyck et al., 2018), this species was  
253 already clearly placed in *Roseinae* as “*R.roseinae* sp. ined”.

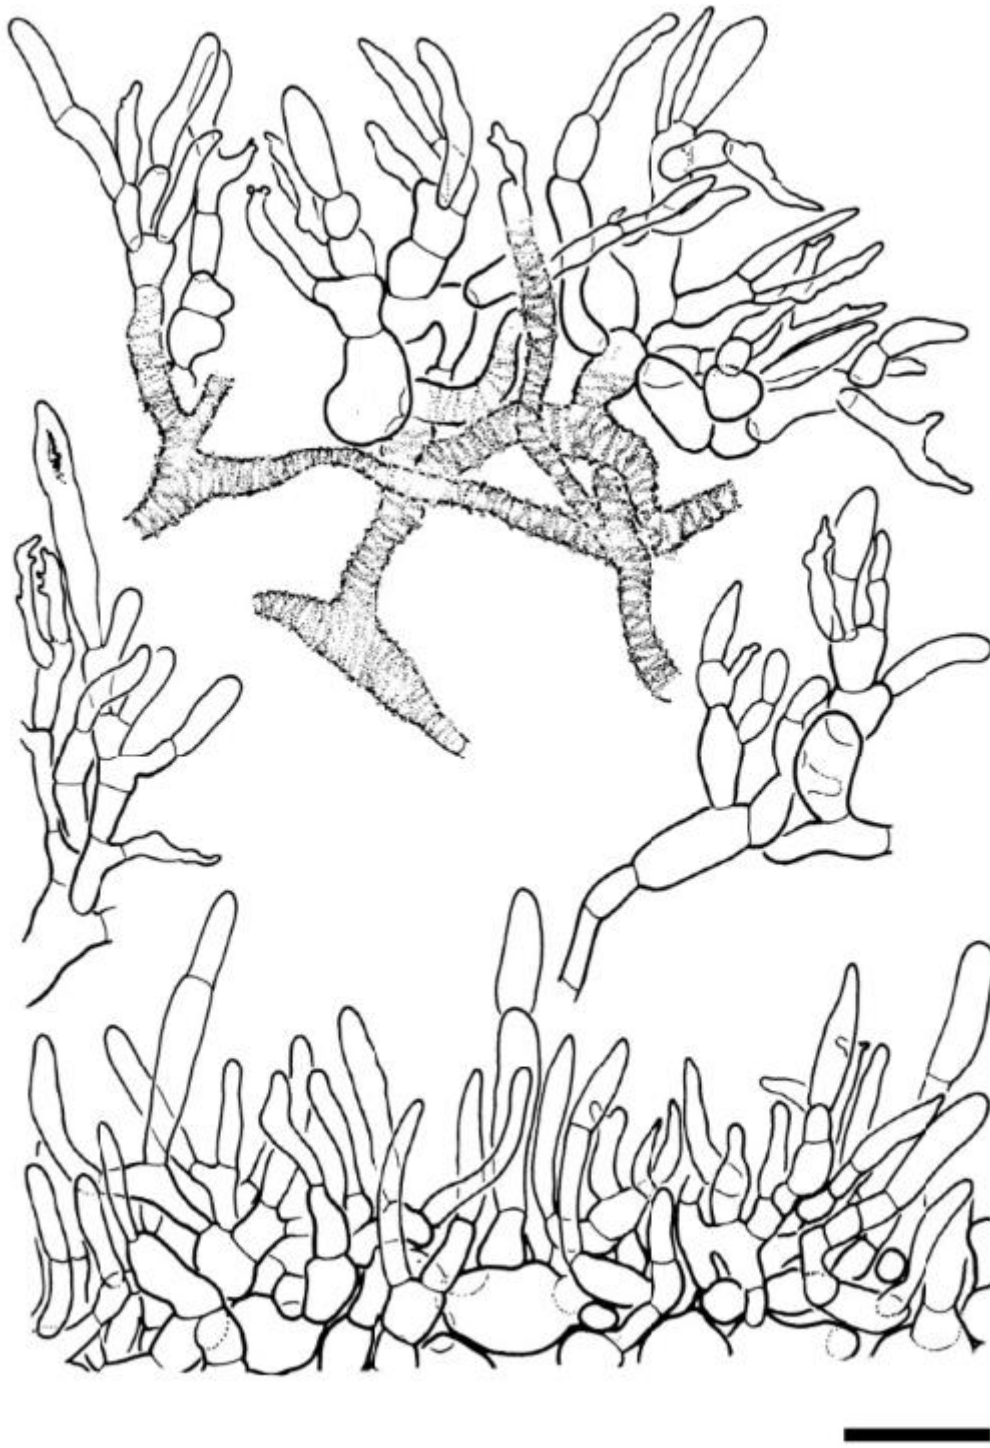

255 Fig. 5. — *Russula incrustata* Buyck, sp. nov. (735/BB09.172, holotype): Details of the  
256 pileipellis. - Scale bar = 20  $\mu\text{m}$ . Drawings B. Duhem.

257

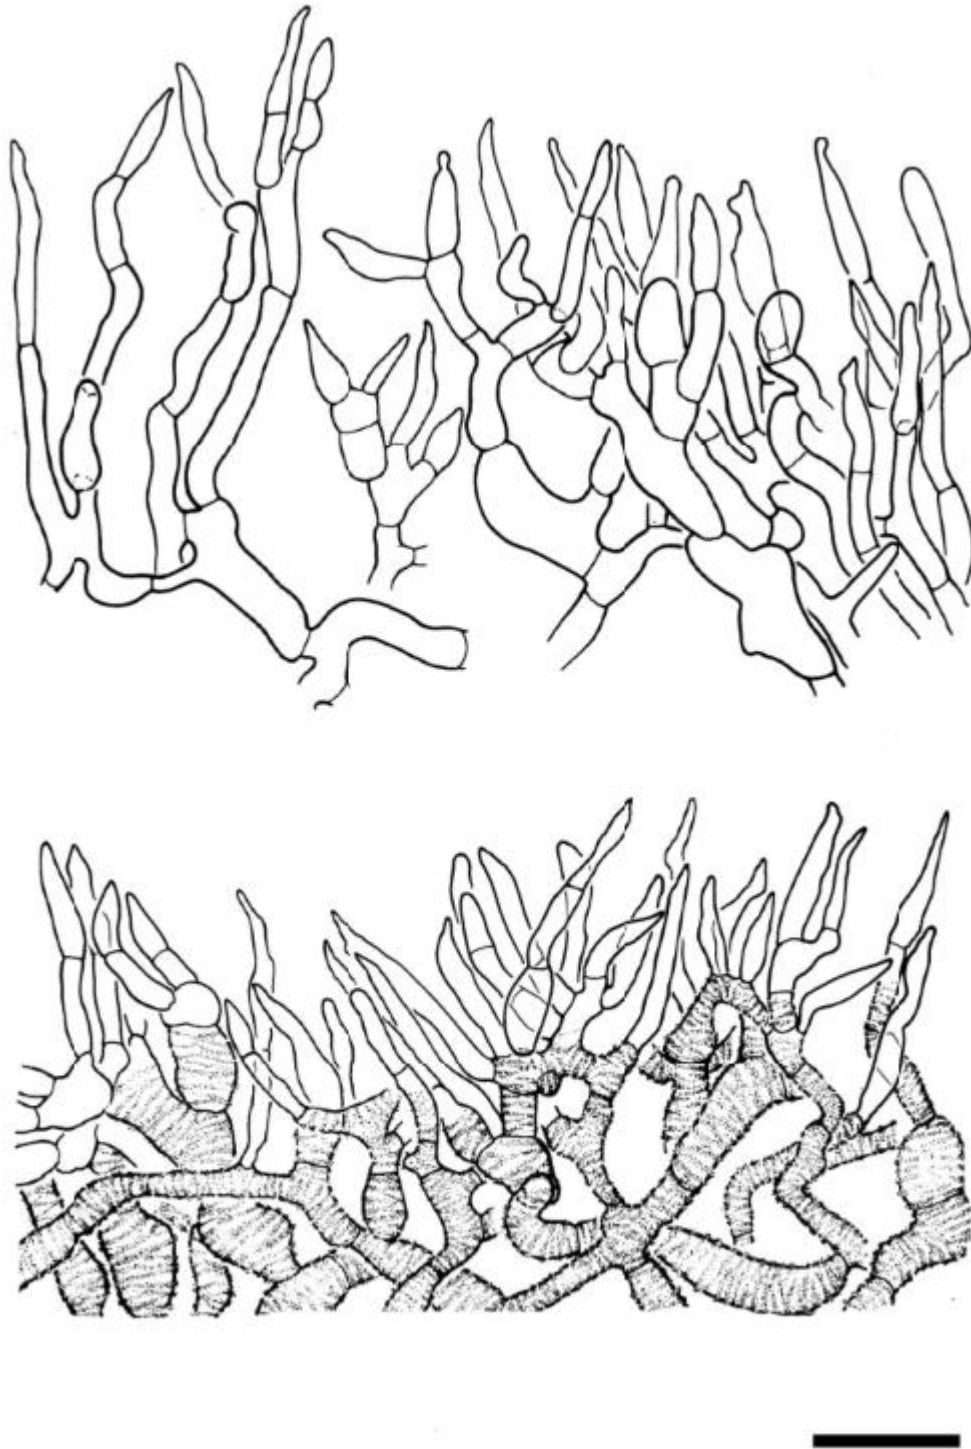

258

259 Fig. 6. — *Russula incrustata* Buyck, sp. nov. (735/BB09.172, holotype): Hyphal terminations  
260 of the pileipellis, continued. - Scale bar = 20  $\mu$ m. Drawings B. Duhem.

261

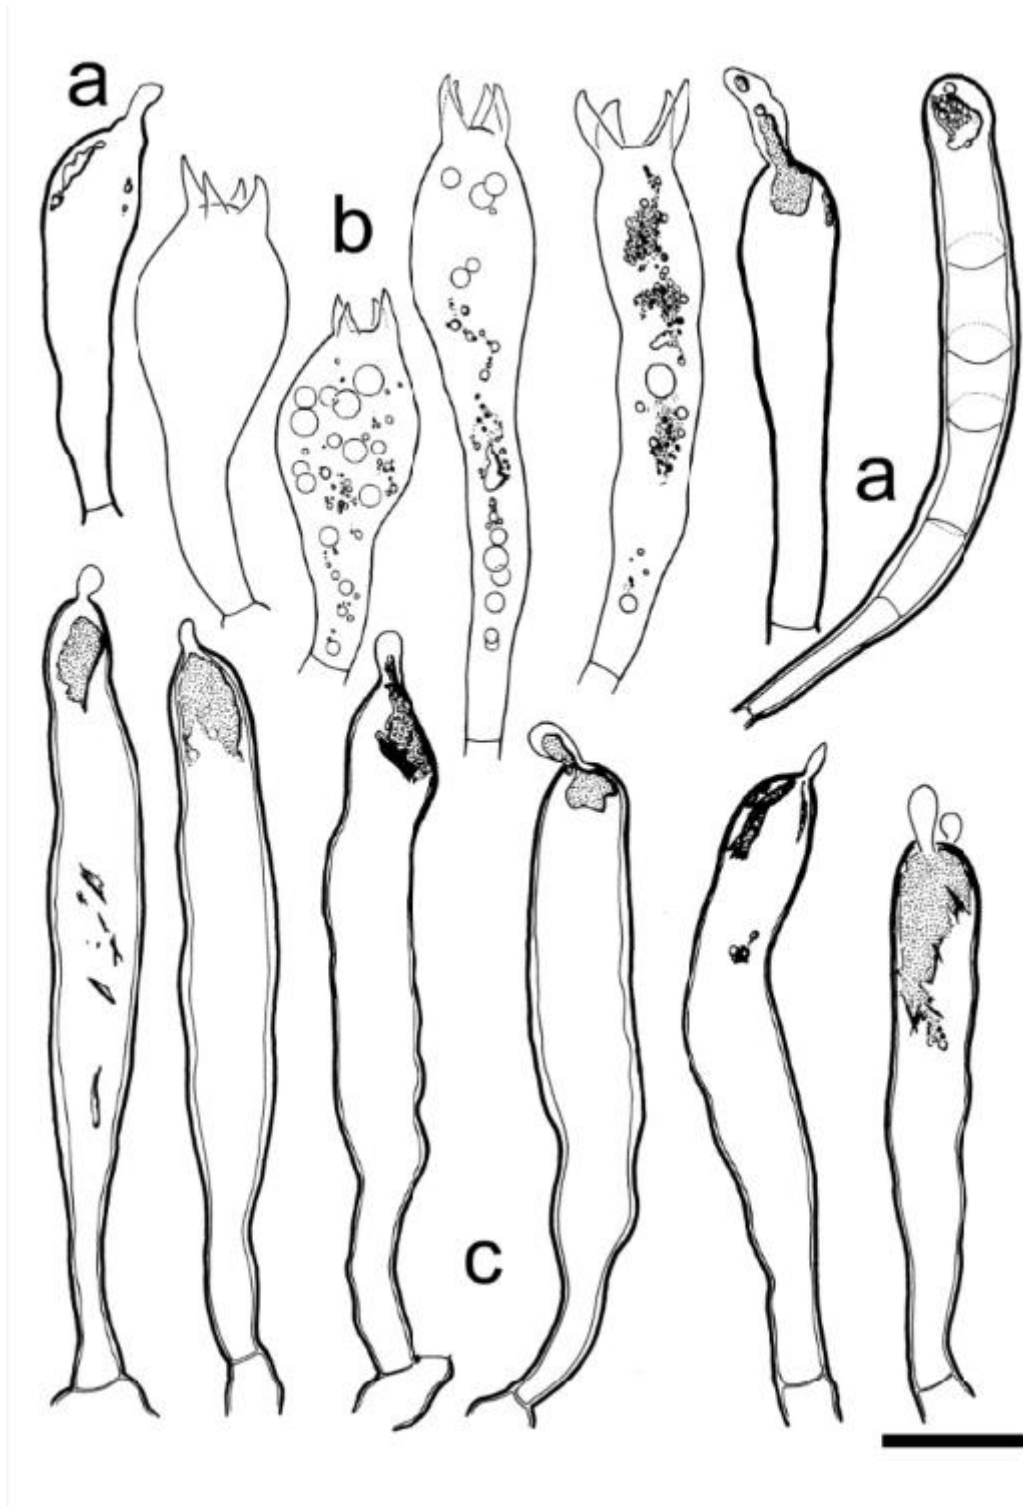

286 Fig. 7. — *Russula incrustata* Buyck, sp. nov. (735/BB09.172, holotype): Details of the  
287 hymenium: a, cheilogloeocystidia, b, basidia; c, gloeocystidium with secondary septa; d,  
288 pleurogloeocystidia. - Scale bar = 10  $\mu$ m. Drawings B. Duhem.

289

290

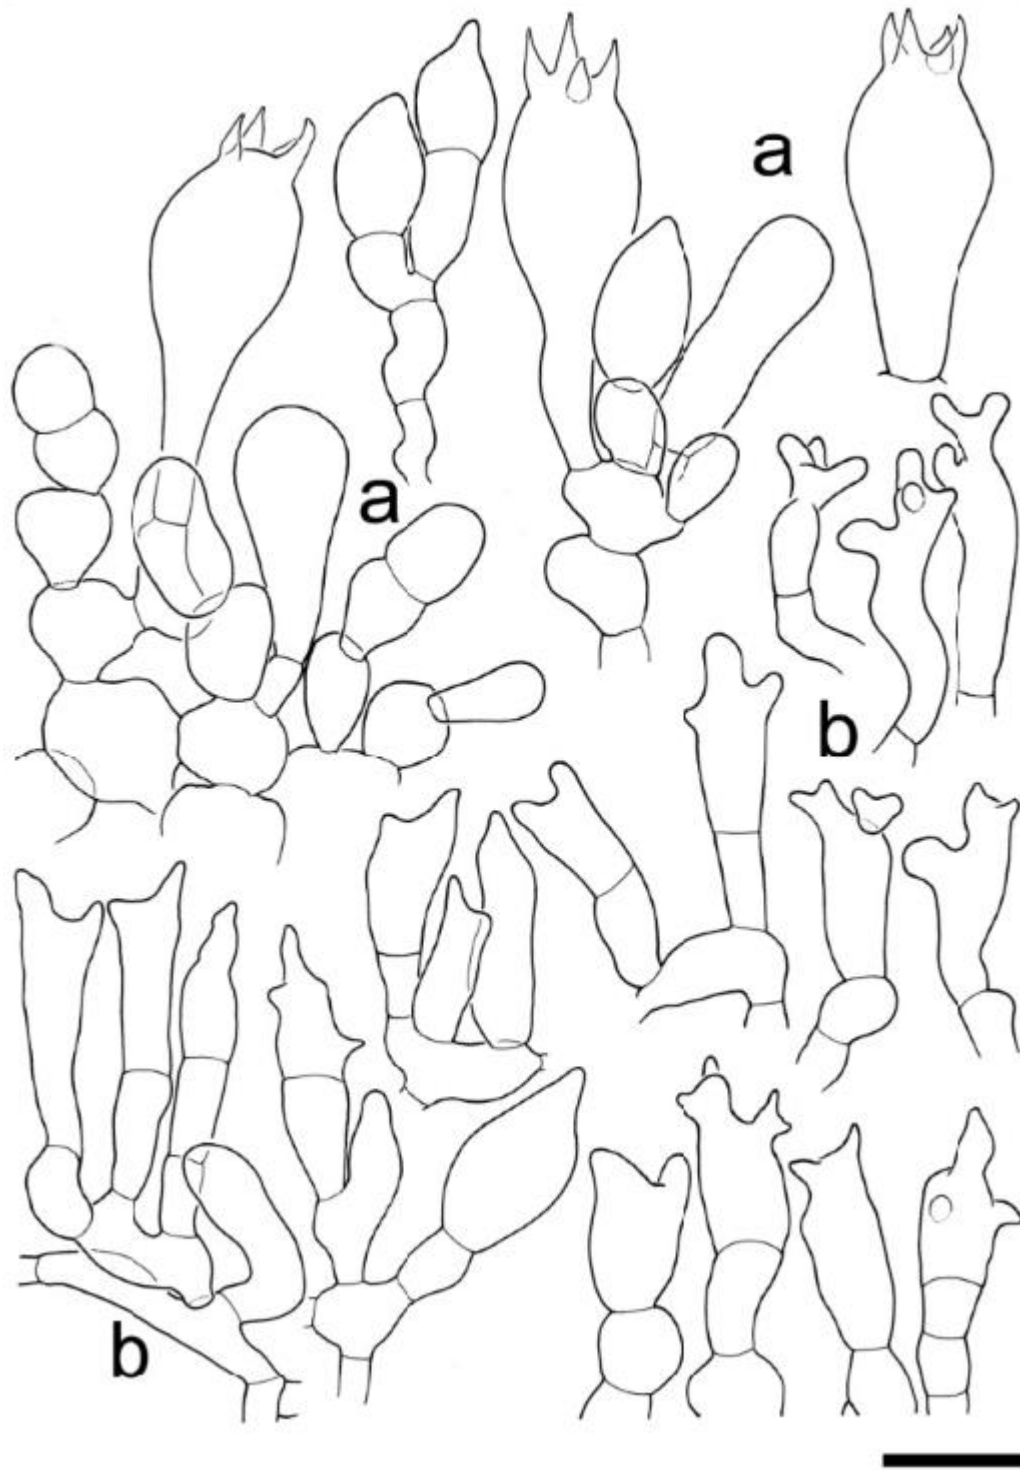

291

292 Fig. 8. — *Russula incrustata* Buyck, sp. nov. (735/BB09.172, holotype). Details of the  
293 hymenium near the gill edge: a, basidiola and basidia; b, marginal cells. - Scale bar = 10  $\mu$ m.

294 Drawings B. Duhem.

295



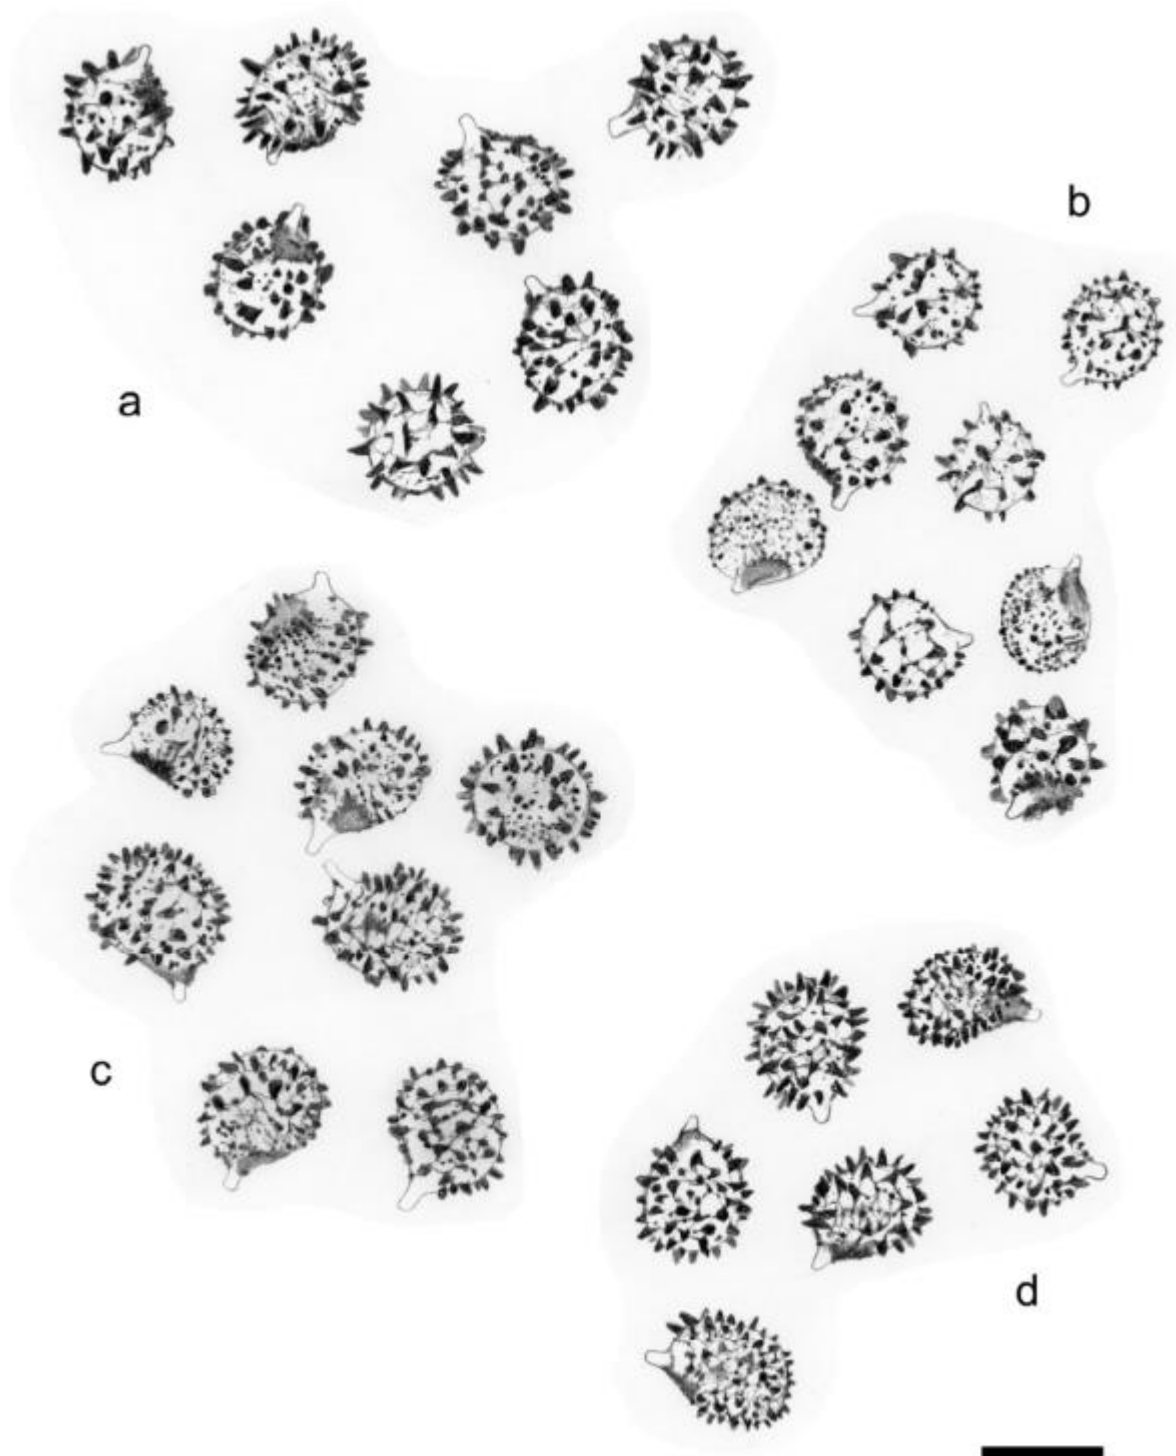

296

297 Fig. 9. — Spore clouds. a-c. *Russula koniamboensis* Buyck, sp. nov. (a: 730/BB09.11, b: 742/  
298 BB09.346, c: 722/ BB09.022, holotype). d, *Russula incrustata* Buyck, sp. nov. (holotype).

299 Scale bar = 10  $\mu$ m.

300

301

302        **2. *Russula koniamboensis* Buyck, *sp. nov.***

303        **Figs. 4, 9a-c, 10-14**

304        Differs from *R. incrustata* in the pale yellowish pileus, white stipe, the somewhat larger spore size and  
305        its occurrence under *Nothofagus*; from *R. purpureotincta* principally in the pileus colour and its  
306        geographic distribution.

307        *Holotype*. — **New Caledonia**. Northern Prov., Massif du Koniambo, near Voh, in the nickel mine  
308        exploitation site called ‘Niko’, S 21° 00’22” – E 164°49’51”, at 724 m alt., on ultramafic soil under  
309        *Nothofagus balansae*, 17 March 2009, leg. B. Buyck, 722/BB 09.022 (PC0142407).

310        Mycobank. —

311        *Additional examined material*. — **New Caledonia**. Northern Prov., Massif du Koniambo, near Voh,  
312        734 m alt., in the “île nickel” mine exploitation site, S 21° 00’42” – E 164°49’50”, on ultramafic soil  
313        under *Nothofagus balansae*, 19 March 2009, leg. B. Buyck 730/BB 09.117 (PC0714855); Massif du  
314        Koniambo, near the Trazy entry of the nickel mine exploitation site, on ultramafic soil under  
315        *Nothofagus codonandra*, 9 April 2009, leg. B. Buyck, 742/BB 09.346 (PC0714856).

316        Etymology. — named after the type locality.

317        *Pileus*

318        25-30 mm diam., convex, slightly depressed in the center, near the margin striate over 1/3-1/4  
319        of the radius, surface dull, smooth to finely or even distinctly farinaceous in the center and  
320        more or less concentrically deposited, peeling 2/3 of the radius, pale yellowish in the center,  
321        cream towards margin.

322        *Lamellae*

323        Equal in length, adnate, distant and ca. 1-2 L/mm at pileus margin, off-white to cream color,  
324        obtusely rounded at the pileus margin; entire edge concolorous.

325        *Stipe*

326        30-34 x 6-8 mm, central, cylindrical to slightly obclavate, glabrous, smooth to finely  
327        longitudinally striate, white to ivory, pale greyish towards base, brittle, spongy inside, lacunes  
328        absent.

329        *Context*

330        Very thin toward the margin, white, distinctly greying in age. Taste and odor not distinctive.

331 *Spore print*

332 white.

333

334 *Spores*

335 (6.67)7.51–8.01–8.51(8.75) x (6.25)6.52–6.83–7.15(7.29)  $\mu\text{m}$ , Q = (1.06)1.10–1.17–

336 1.24(1.31), subglobose to broadly ellipsoid; ornamentation subreticulate, composed of large,

337 prominent, moderately distant, conical to hemispherical and strongly amyloid spines, up to

338 1(–1.5)  $\mu\text{m}$  long, connected by dispersed to frequent fine lines into a (very) incomplete

339 network; suprahilar spot well–developed, varying from strongly amyloid to verruculose and

340 grayish to poorly amyloid.

341 *Basidia*

342 30–42  $\times$  12–17  $\mu\text{m}$ , clavate, of variable shape, fusiformous to distinctly clavate, with (2–)4

343 stout sterigmata; basidiola clavate.

344 *Subhymenium*

345 pseudoparenchymatic.

346 *Hymenial gloeocystidia*

347 68–94  $\times$  7–12  $\mu\text{m}$  on lamellar sides, smaller near the lamella edges, up to 45  $\mu\text{m}$  long,

348 narrowly clavate to fusiform or subcylindrical, frequently mucronate to appendiculate at the

349 apex, up to 14  $\mu\text{m}$  long, originating in subhymenium and protruding beyond the basidia, thin–

350 walled with walls up to 1  $\mu\text{m}$  thick; contents in Congo Red mainly restricted to dispersed

351 refringent inclusions of variable size that do not react to sulfovanillin.

352 *Marginal cells*

353 15–26(–34)  $\times$  4–6(–9)  $\mu\text{m}$ , sitting on 1–2 short, subterminal cells, small, occupying most of

354 the lamellar edges, extremely variable in shape, similar to the smaller terminal cells in the

355 suprapellis in having 1–4 diverticulate, obtuse lobes or outgrowths.

356 *Pileipellis*

357 40–60  $\mu\text{m}$  thick, two–layered, not well delimited from the underlying context, in the lower

358 part composed of hyphae with or without distinct orthochromatic incrustations, forming a

359 pseudoparenchyma of intertwined and strongly ramifying, ascending to erect, irregularly  
360 shaped, thin-walled cells; basal cells sometimes up to 20(–25)  $\mu\text{m}$  wide, near the surface  
361 giving rise to short chains composed of 2–4(–5), narrower cells that are slightly inflated and  
362 barrel-shaped, ellipsoid to subcylindrical, up to 10  $\mu\text{m}$  wide; terminal cells of variable size  
363 and either longer or shorter than subterminal cells, (8–)16–23(–34)  $\times$  2–4(–6)  $\mu\text{m}$ , often very  
364 irregular or undulate in outline, slightly attenuating toward the frequently capitate,  
365 appendiculate diverticula at apex. Primordial hyphae recognizable mostly by their somewhat  
366 more regular outline, but especially by the refringent granular–heteromorphic contents of the  
367 terminal cell that mostly measures 15–25  $\times$  4–5  $\mu\text{m}$ , narrowly clavate to subcylindrical in  
368 outline, obtuse rounded at the apex, diverticula or appendages absent, thin-walled. Cystidioid  
369 hyphae absent in subpellis and context. Oleiferous hyphae rare.

370 *Clamp connections*

371 absent.

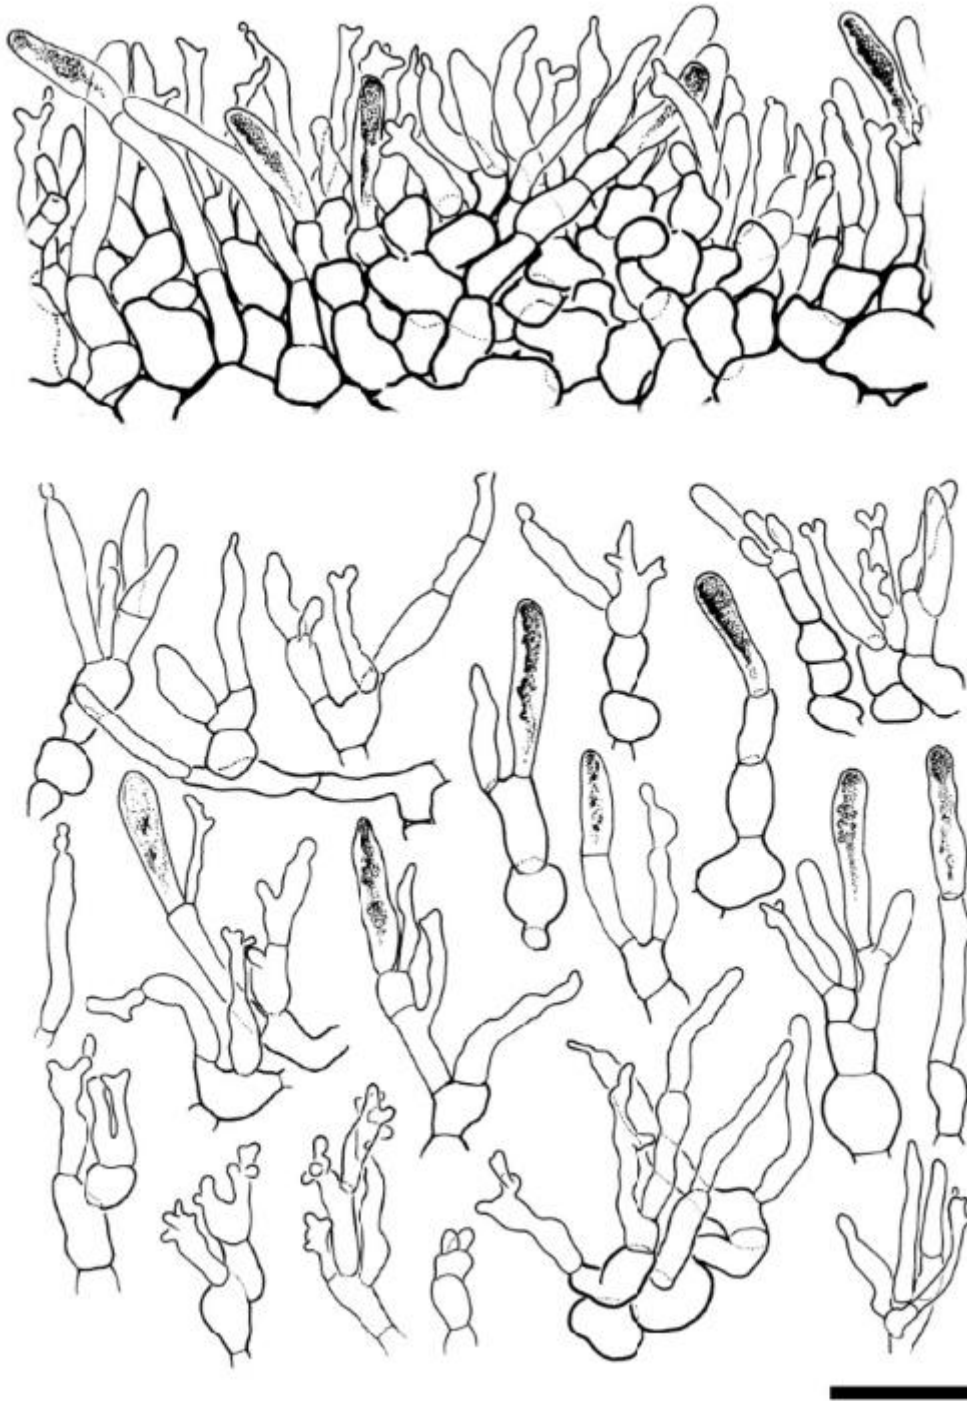

396 Fig. 10. — *Russula koniamboensis* Buyck, sp. nov. (722/BB09.022, holotype). Details of the  
397 pileipellis. Note that all capitate-mucronate endings are optically empty; these are not  
398 pileocystidia, notwithstanding they are morphologically very similar to the pileocystidia of  
399 species in subg. *Heterophyllidiae*, while all terminal cells of primordial hyphae are obtuse-  
400 rounded at their apex and possess refringent contents reminiscent of typical pileocystidia.  
401 Scale bar = 20  $\mu$ m. Drawings B. Duhem.

402

403

404

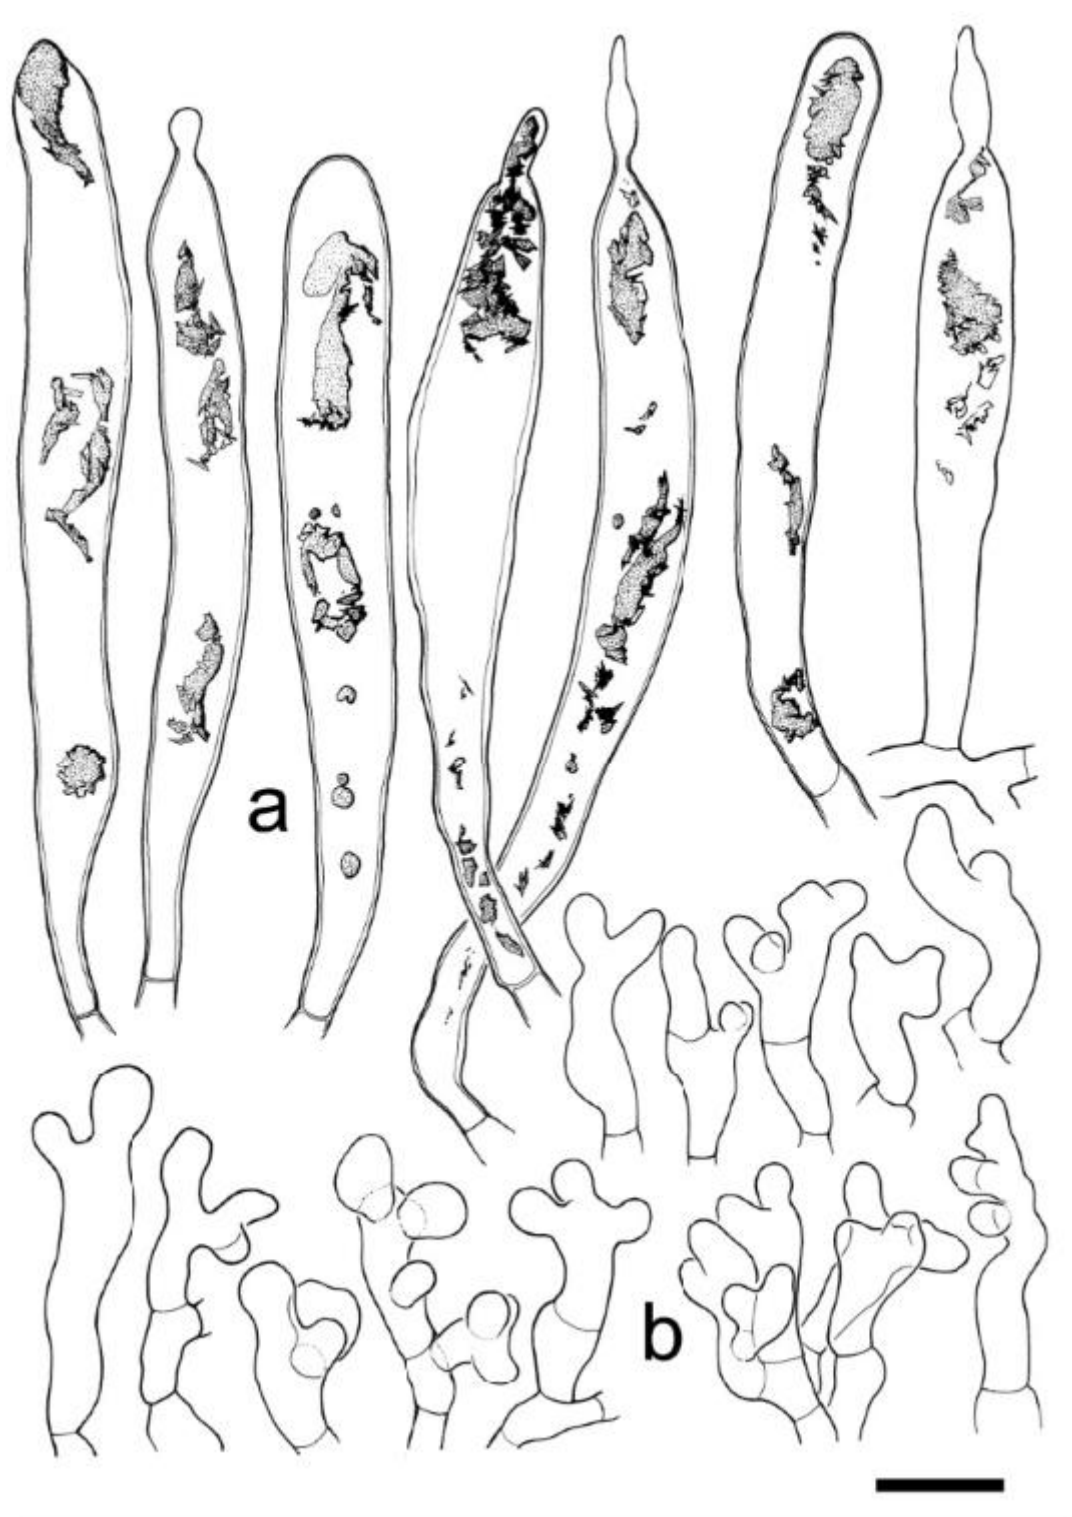

405

406 Fig. 11. — *Russula koniamboensis* Buyck, sp. nov. (722/BB09.022, holotype). Elements of  
407 the hymenium; top row: pleurogloeocystidia with indication of contents; bottom, marginal  
408 cells. Scale bar = 10  $\mu$ m. Drawings B. Duhem.

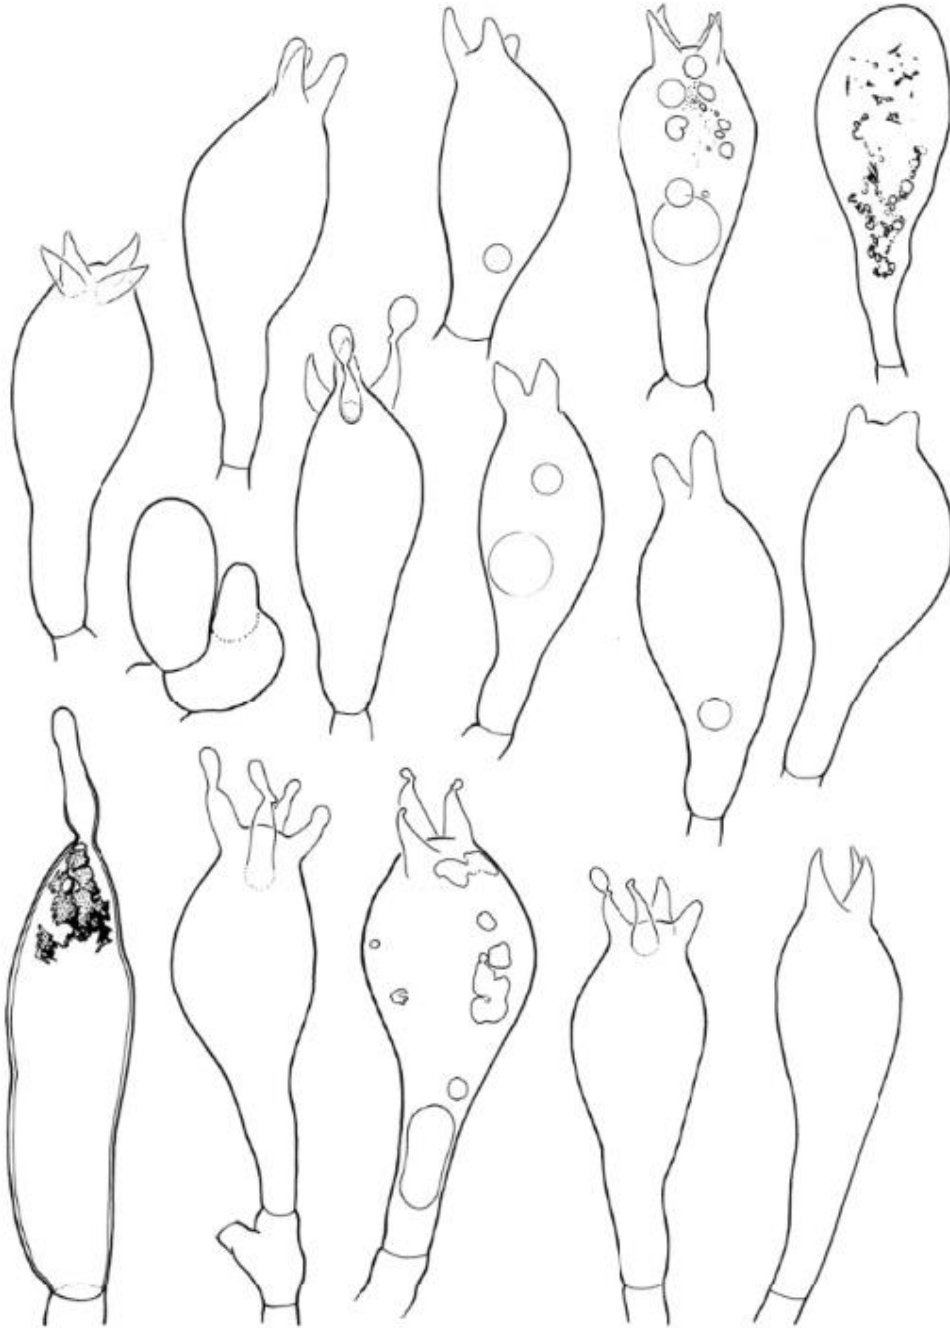

409

410 Fig. 12. — *Russula koniamboensis* Buyck, sp. nov. (722/BB09.022, holotype). Elements of  
411 the hymenium; cheilogleocystidium; basidia and basidiola. - Scale bar = 10  $\mu$ m. Drawings B.  
412 Duhem.

413

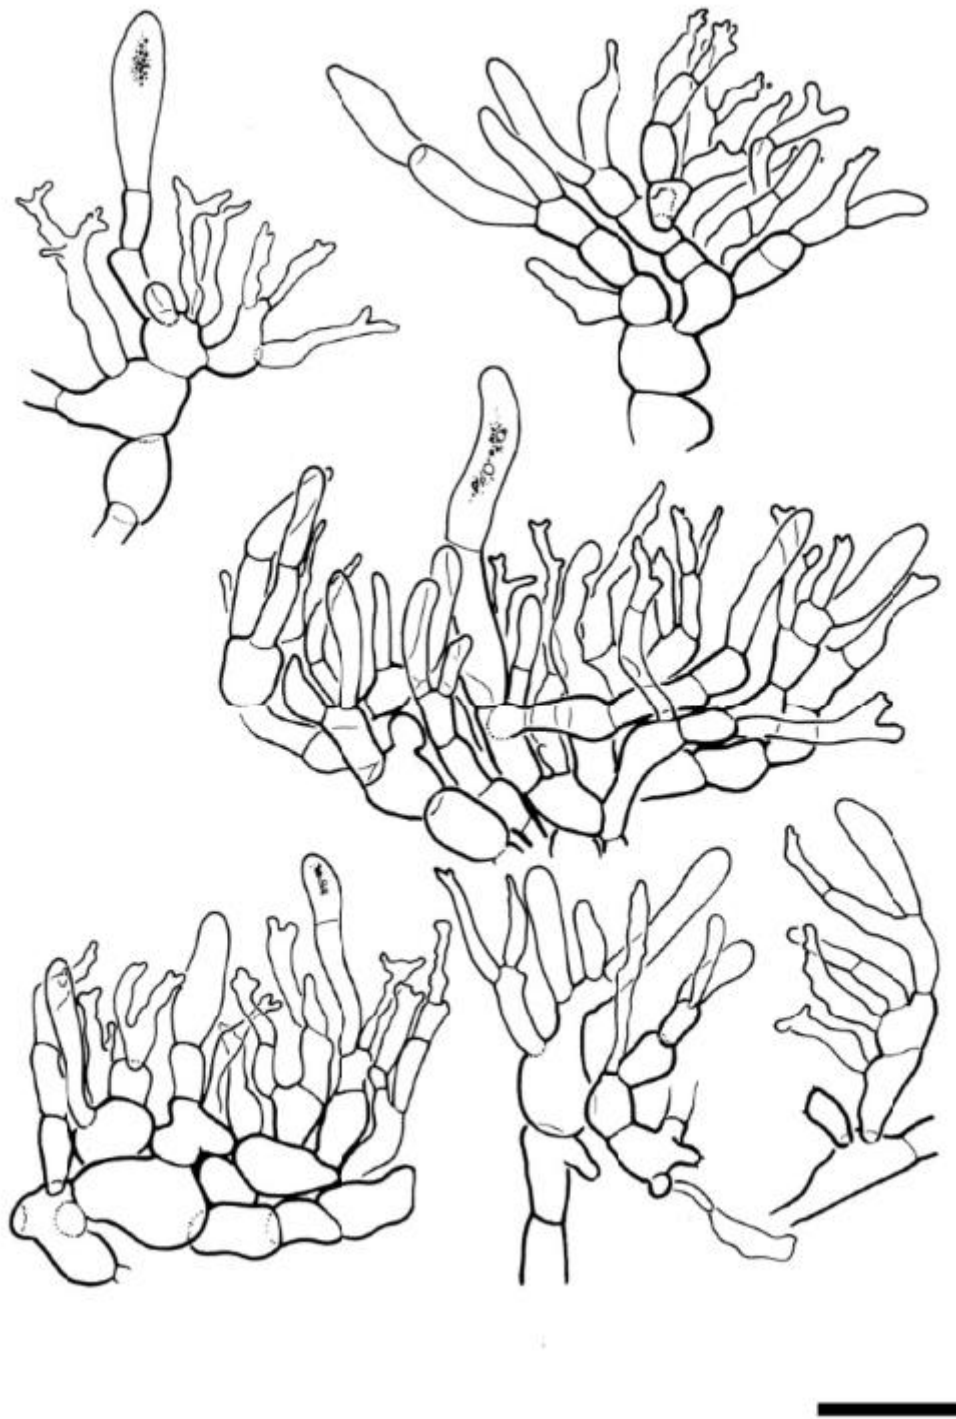

414

415 Fig. 13. — *Russula koniamboensis* Buyck, sp. nov. (722/BB09.022, holotype). Fragments of  
416 the suprapellis. - Scale bar = 20  $\mu$ m. Drawings B. Duhem.

417



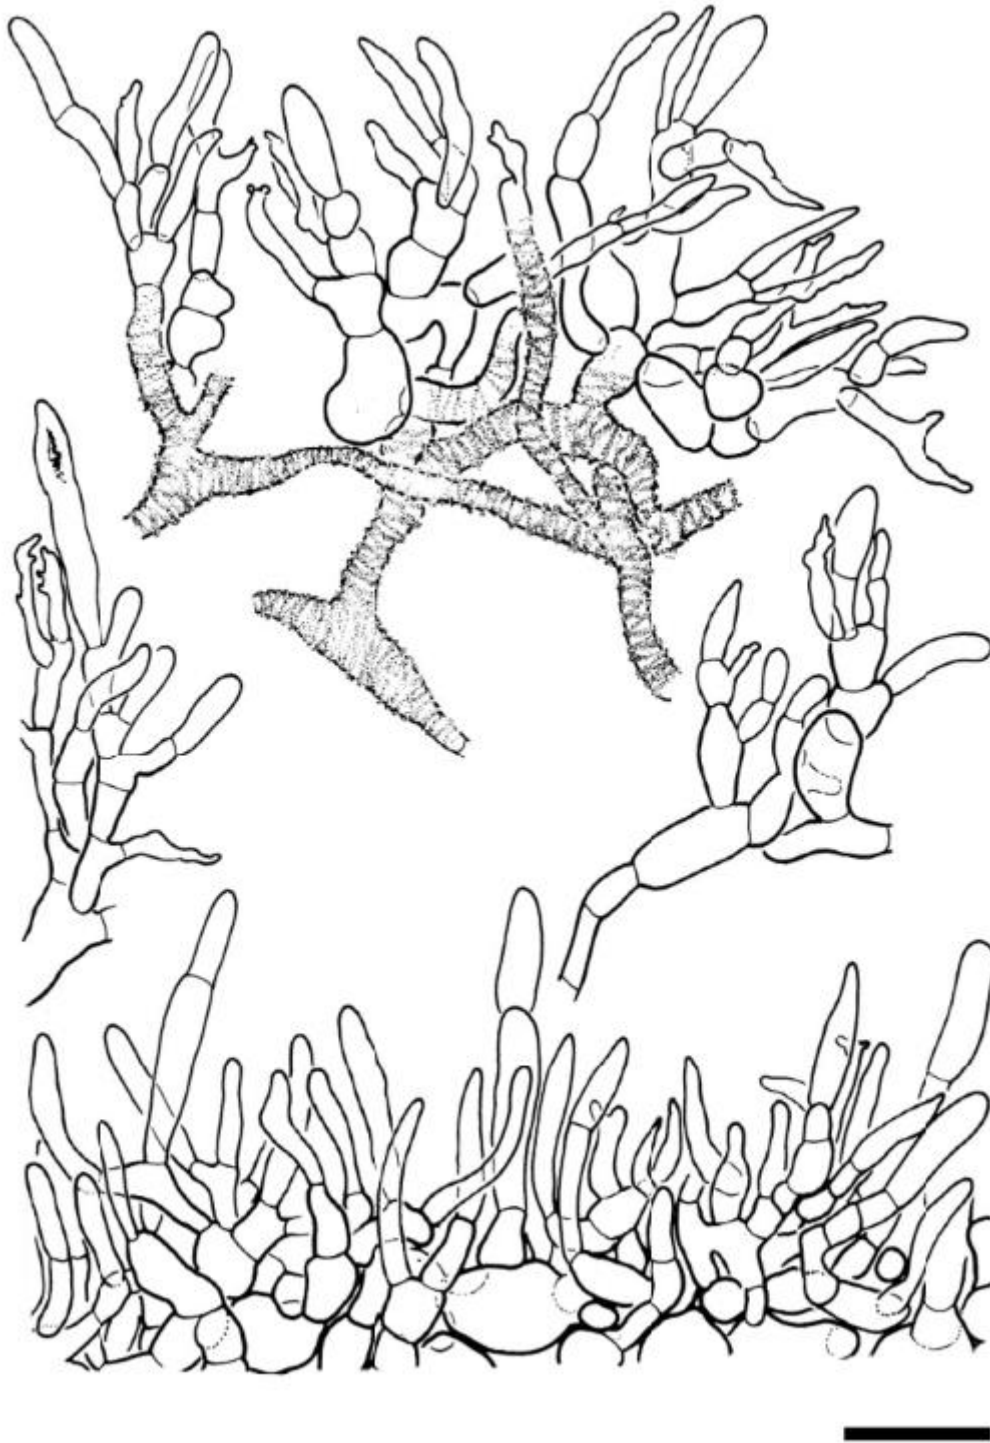

418

419 Fig. 14. — *Russula koniamboensis* Buyck, sp. nov. (730/BB09.117): Details of the  
420 suprapellis. - Scale bar = 20  $\mu$ m. Drawings B. Duhem.

421

422

423 *Notes:* The above description is based on the holotype collection. However, the two other collections  
424 of this species (having identical ITS sequences) clearly show that its microscopic features are quite  
425 variable among different collections. For the pileipellis this variation concerns the size of the  
426 sphaerocytes in the lower suprapellis which are sometimes up to 35  $\mu\text{m}$  diam., giving rise to 8-celled  
427 chains (as in *BB09.346*); observed variations apply also to the presence/absence of distinct  
428 orthochromatic zebroid incrustations on the cell walls in the lower pileipellis (present in *BB09.117*)  
429 and finally also to the form of the terminal cells on the hyphae. The latter can be either more regular in  
430 outline and similar to those of *R. incrustata* (as in *BB09.346* and *BB09.117*) or strongly diverticulate  
431 as in the type collection. On the lamella edge, cheilocystidia can be abundant and well-developed (as  
432 in *BB09.346*) or just dispersed among the other elements. The spores in *BB09.346* are near-identical in  
433 size and ornamentation to the holotype [(8.13)8.20-**8.63**-9.05(9.38) x (6.25)6.47-**6.86**-7.26(7.50)  $\mu\text{m}$  ,  
434  $Q = (1.11)1.17$ -**1.26**-1.35(1.40)], while spores in *BB09.117* produced several aberrant sizes and  
435 ornamentations indicating an unfavourable development. These spores were, therefore, not used for  
436 measurements.

437

438

439 3. *Russula purpureotincta* R.F.R. McNabb, *New Zealand Journal of Botany* 11: 711.  
440 1973.

441 Figs. 15-18

442 *Examined material.* — **New Zealand.** Prov. Nelson, Springs Junction, Upper Grey, among *Sphagnum*  
443 under *Nothofagus [Fuscospora] solandri* var. *cliffortioides* and *Nothofagus [Lophozonia] menziesii*,  
444 25 Febr. 1968, *E. Horak* (ZT 68-086); Prov. Nelson, W of Tophonse Saddle, at the border of a swampy  
445 locality between moss (not *Sphagnum*) under *Nothofagus [Fuscospora] solandri* var. *cliffortioides* and  
446 *Nothofagus [Lophozonia] menziesii*, 3 March 1968, *E. Horak* (ZT 68-105).

447

448 *Pileus*

449 Up to 75 mm diam., at first convex, becoming slightly depressed in the center with age, near  
450 the margin smooth to shortly striate; surface dull, when humid weakly viscid, at first reddish  
451 lilac to purplish, but rapidly discoloring, particularly between the center and the very margin,  
452 and then becoming beige-brownish-pinkish to flesh-colored, pileipellis separable up to mid-  
453 radius.

454 *Stipe*

455 36-80 x 10-19 mm, cylindrical or slightly narrowing towards apex, entirely white, smooth or  
456 finely striate lengthwise.

457 *Lamellae*

458 Equal in length or with rare lamellulae, 4-6 mm wide, normally spaced (ca. 1L/mm at the  
459 pileus margin), white, becoming cream with age, not anastomosing in the dorsal interspaces,  
460 obtusely rounded at the pileus margin; gill edge smooth, concolorous.

461 *Context*

462 brittle, spongy, white, unchanging on exposure. Odour not distinctive. Taste mild.

463 *Spore print*

464 white.

465

466 *Spores*

467 (8.13–)8.32–~~8.74–8.93~~–9.43(–10.21) x (6.67–)6.99–~~7.28–7.29~~–7.57(–7.92)  $\mu\text{m}$ , Q = (1.11–  
468 )1.14–~~1.20–1.23~~–1.28(–1.34), large, subglobose to broadly ellipsoid, densely ornamented  
469 with strongly to partly amyloid spines or cylindrical warts, these up to 2  $\mu\text{m}$  high in many  
470 spores and frequently curved, often in pairs, with few smaller granular warts and rare  
471 interconnecting fine lines; suprahilar spot distinctly amyloid.

472 *Basidia*

473 40–48 x 12–15  $\mu\text{m}$ , clavate, 4–spored; sterigmata stout, mostly 7–8 x 2–3  $\mu\text{m}$ .

474 *Hymenial gloeocystidia*

475 Mostly 70–90 x 12–15  $\mu\text{m}$ , abundant, on lamellar sides clavate to fusiform, thin– to slightly  
476 thick–walled; near lamellar edges distinctly thick–walled (up to 2–3  $\mu\text{m}$  thick in middle  
477 portion) and smaller, mostly 40–60 x 7–12  $\mu\text{m}$ , rarely with an additional septum in the upper  
478 part.

479 *Marginal cells*

480 Not differentiated.

481 *Pileipellis*

482 Two-layered: the suprapellis forming a trichoderm of densely packed, narrow and thin-  
483 walled hyphal extremities composed of 3–6 short cells and originating from a  
484 pseudoparenchymatic layer underneath; the latter is composed of much more inflated,  
485 sausage-like, ellipsoid or spherical cells up to 30  $\mu\text{m}$  diam., without zebroid incrustations on  
486 the cell walls; suprapellis composed of hyphal extremities with terminal cells in the pileus  
487 center short to very short, rarely exceeding 20 x 3–5  $\mu\text{m}$ , either narrowing in the upper part or  
488 clavate, often slightly undulate in outline, toward the pileus margin more irregular in outline  
489 and very frequently globose to moniliform at apex. Typical pileocystidia absent. Primordial  
490 hyphae emerging from the surface of the suprapellis, slightly more voluminous than the other  
491 hyphal extremities and composed of 3–6, thin-walled cells, usually more strongly septate in  
492 the pileus center; their cells shortly cylindrical to barrel-shaped, and mostly also recognized  
493 by distinctly refringent, granular contents, up to 8  $\mu\text{m}$  diam., the terminal cell frequently up to  
494 35  $\mu\text{m}$  long, more regular in outline compared to the other sometimes subcapitate hyphal  
495 extremities. Cystidioid and oleiferous hyphae lacking.

496 *Clamp connections*

497 absent.

498

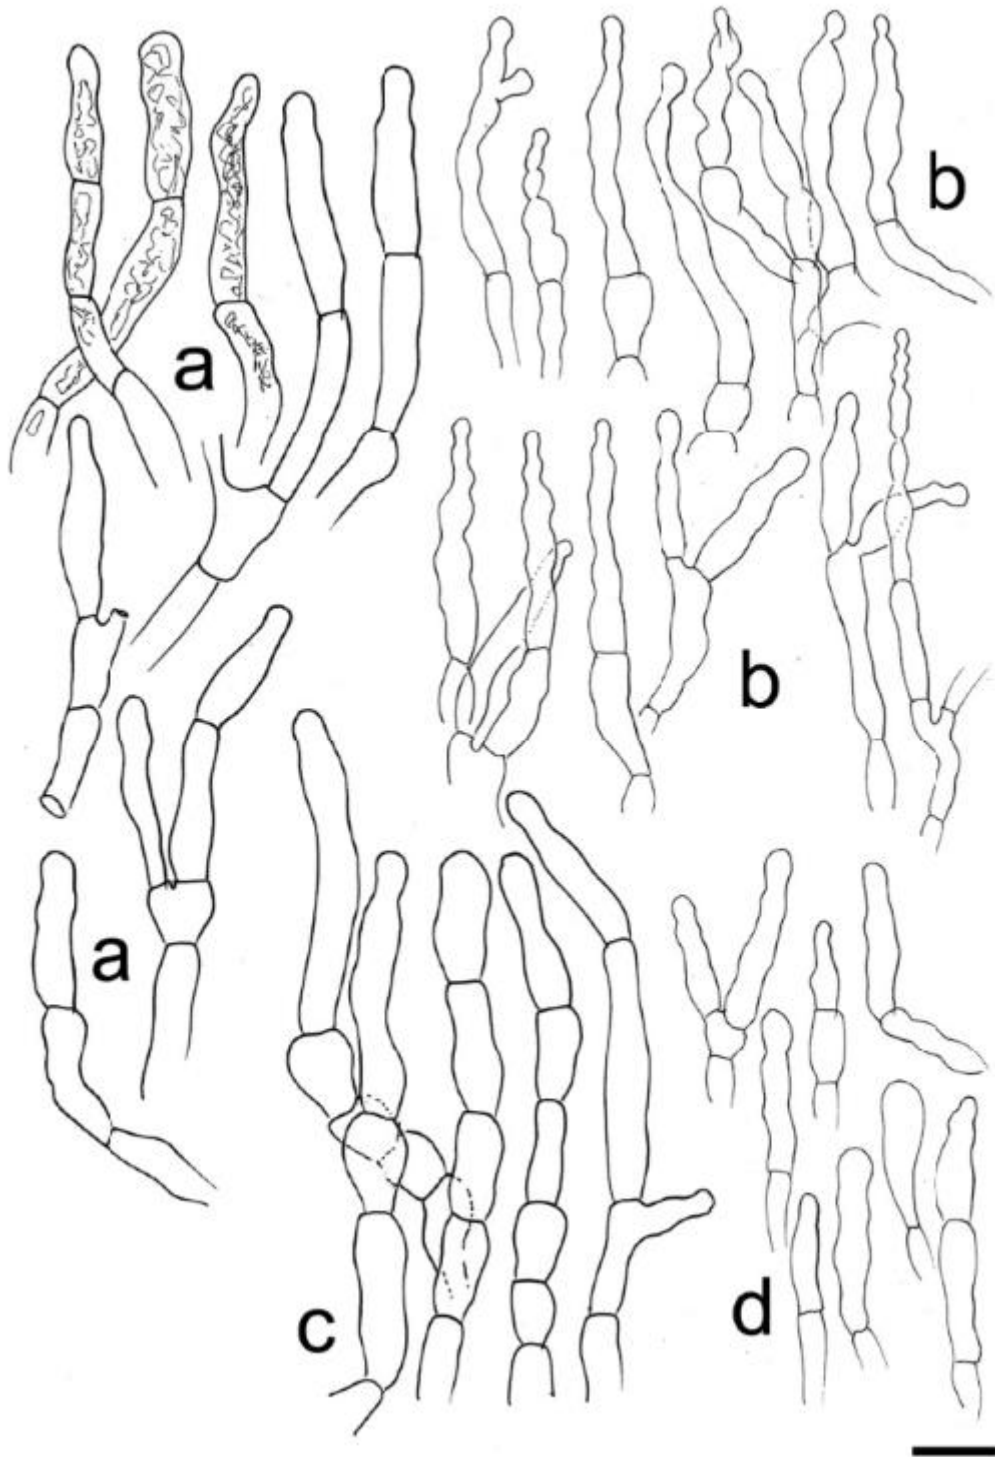

499

500 Fig. 15. — *Russula purpureotincta* (ZT 68-105): a-b. Elements of the pileipellis near pileus  
501 margin: a, primordial hyphae with indication of contents in few cells; b, terminal cells of the  
502 other hyphal extremities; c-d. Elements of the pileipellis in the pileus center: c, primordial  
503 hyphae without indication of contents; d, terminal cells of other hyphal extremities. Scale bar  
504 = 10  $\mu$ m (Drawings B. Buyck)

505

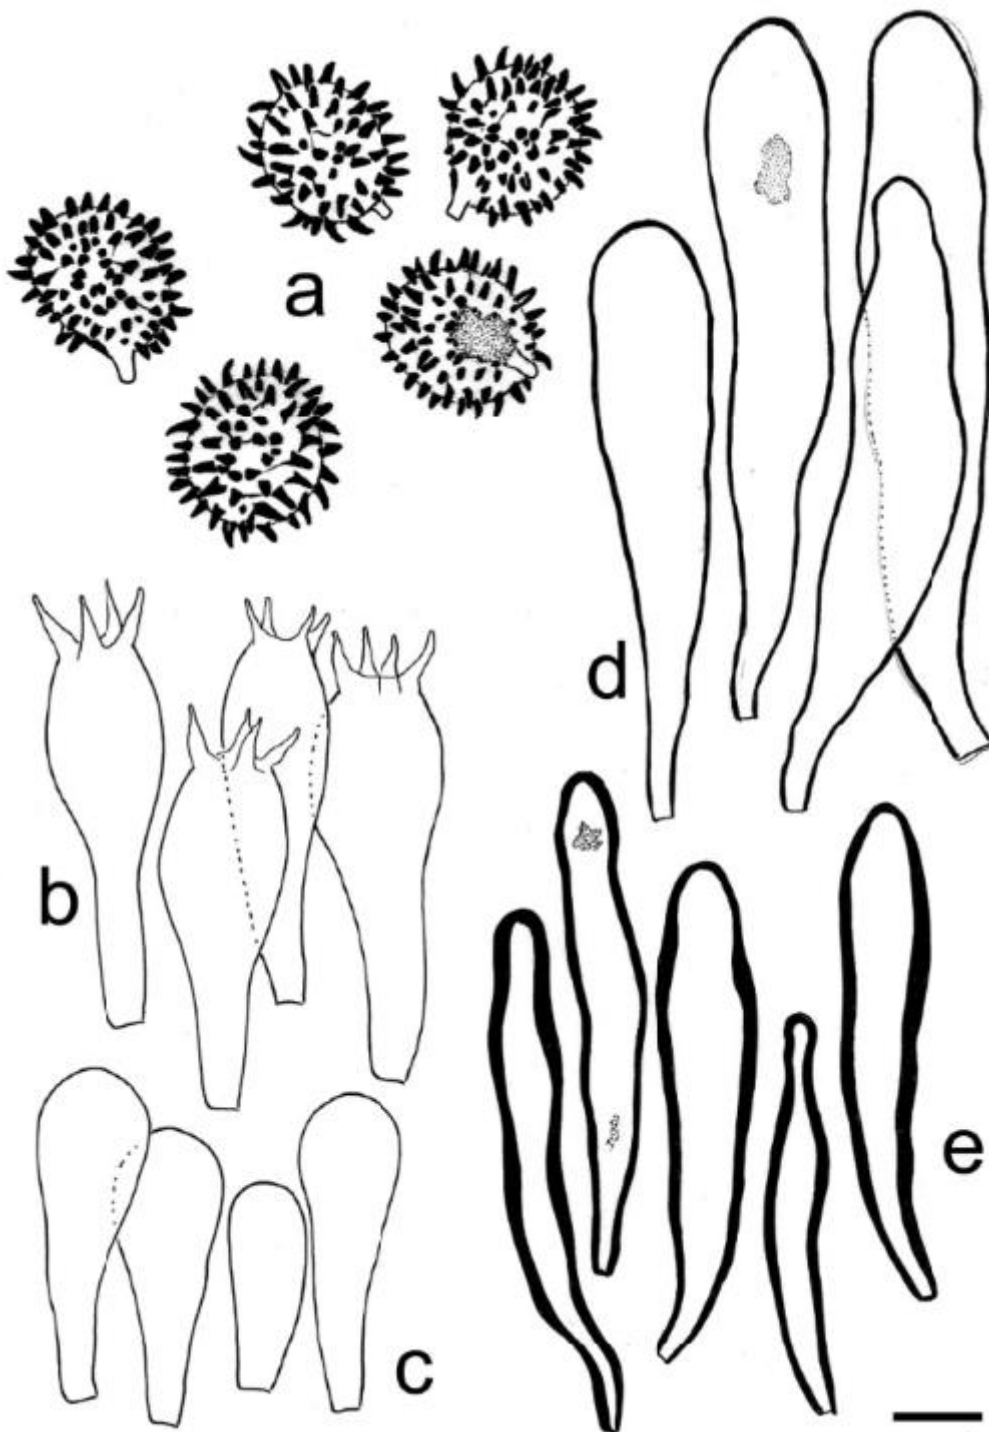

506

507 Fig. 16. — *Russula purpureotincta*. Elements of the hymenium (all from ZT 68-105, except b  
508 from ZT 68-086). a-b, basidiospores; c, basidia; d, basidiola; e, pleurocystidia; f,  
509 cheilocystidia. Scale bar = 10  $\mu$ m. Drawings B. Buyck.

510

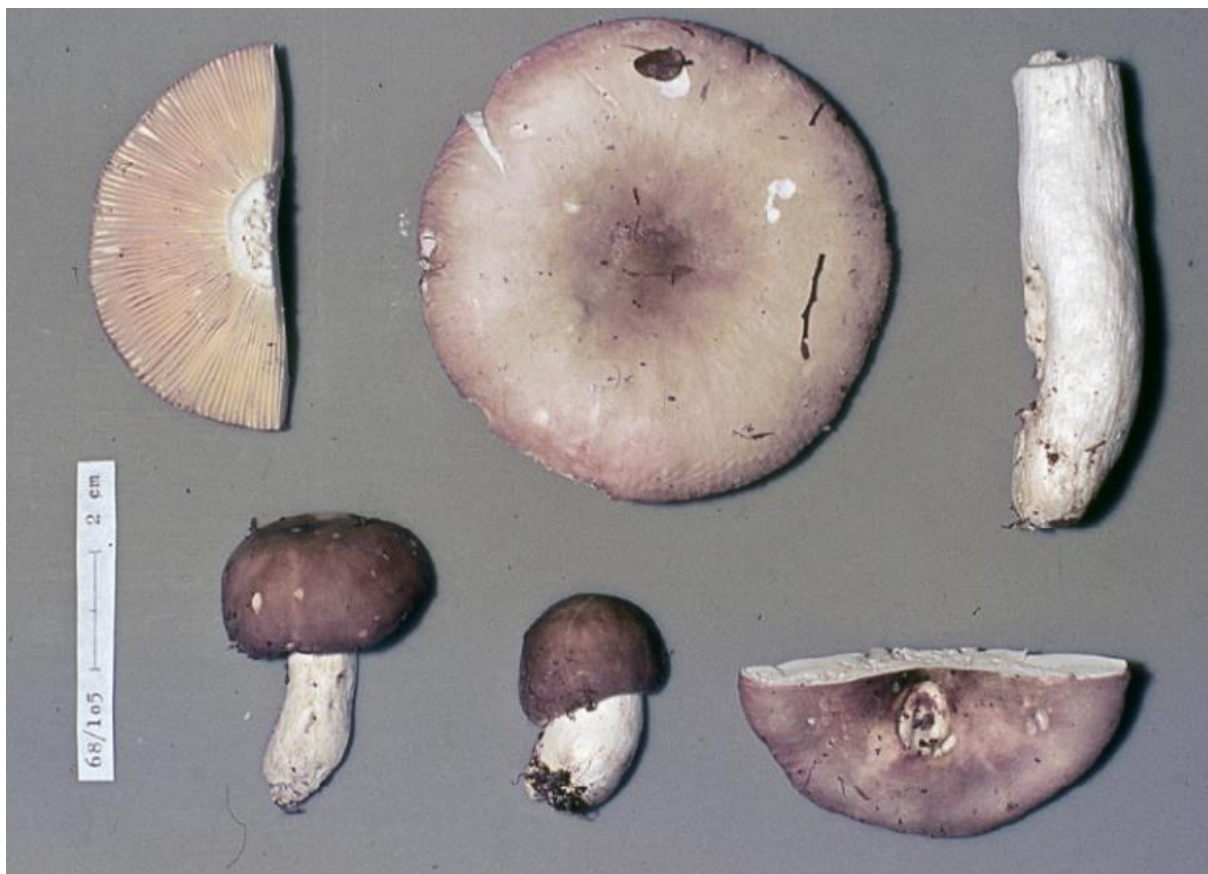

511

512 Fig. 17. — *Russula purpureotincta*. Fresh basidiomata (ZT 68-105). Photo E. Horak.

513

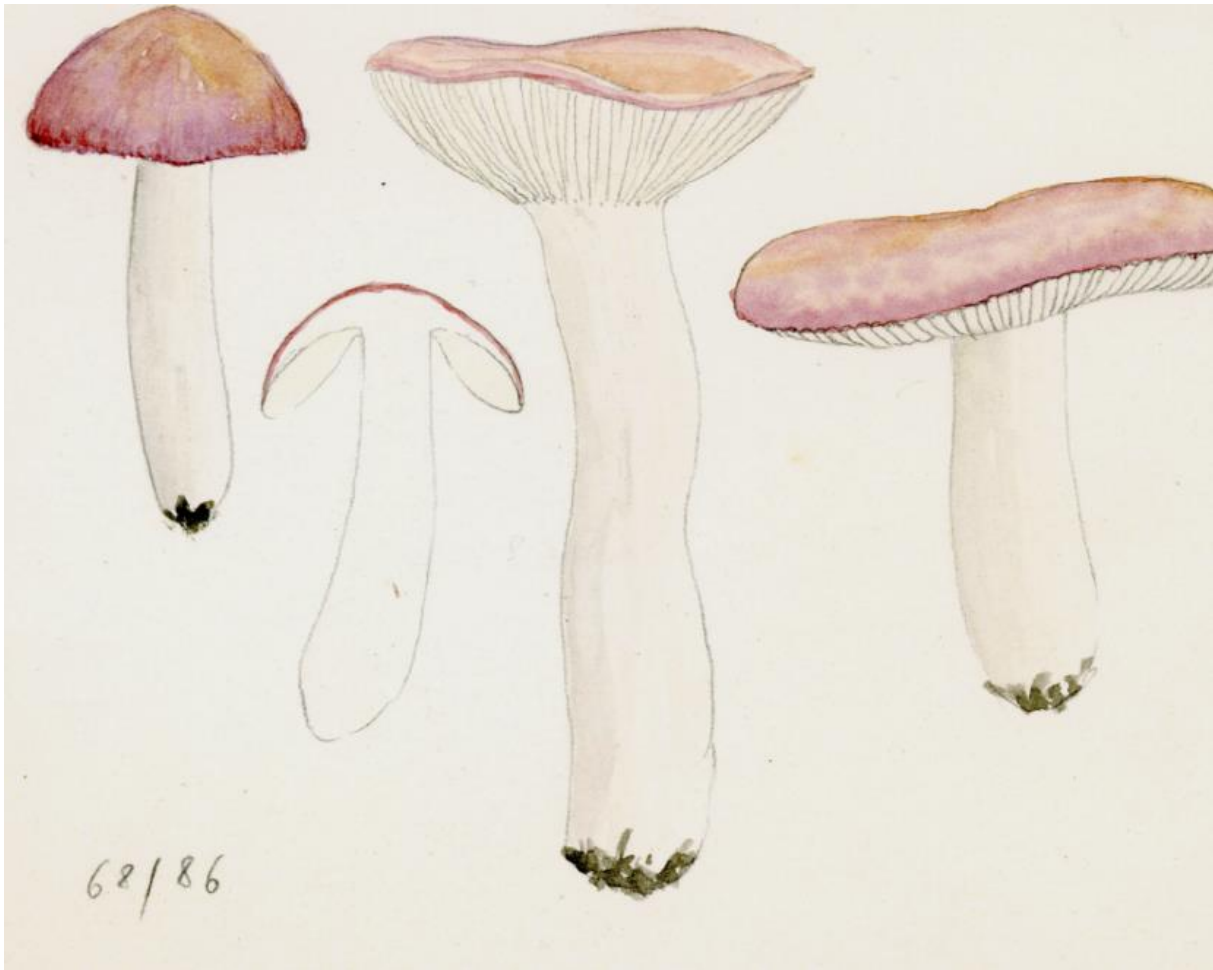

514

515 Fig. 18. — *Russula purpureotincta*. Fresh basidiomata (ZT 68-068). Watercolour by E. Horak.

516

517 *Notes:* The description is based on two collections gathered by E. Horak one year before the species  
518 was described by R.F.R. McNabb (1973) as *R. purpureotincta*. Our description is highly similar to the  
519 original description, taking into account that the spore size given by McNabb (9-12 x 8.5-10.5  $\mu\text{m}$ )  
520 includes the spore ornamentation. In addition, McNabb was probably not aware of the concept of  
521 ‘primordial hyphae’.

522 This endemic species of New Zealand seems to be widely distributed and is not rare as many records  
523 are reported online (e.g. on <https://scd.landcareresearch.co.nz>). The online available field images,  
524 illustrations of microscopic features and SEM pictures of the spores for these collections (including for  
525 the type collection) clearly confirm our own observations on Horak’s specimens.

526 *Russula purpureotincta* is represented in our ITS phylogeny by nine sequences, including one newly  
527 produced sequence from the type specimen and one [GU222259 for PDD77740] that corresponds to a  
528 very pale collection initially identified as *Russula cremeo-ochracea* (and still deposited as such in  
529 GenBank). McNabb’s species resembles our *R. incrustata* because of the faint greyish magenta,



530 greyish purple to reddish grey tints present in the pileus, but it lacks the warmer orange-red tints of our  
531 New Caledonian species which, in addition, has a coloured stipe. As evident from online published  
532 pictures for *R. purpureotincta*, the stipe can frequently be obclavate and can vary considerably in  
533 length between different specimens.

534 *Russula purpureotincta* is very variable in overall colour, but typically discolours very rapidly leaving  
535 a pale sordid whitish-isabelline pileus with only faint greenish-pinkish hues remaining in the center  
536 and at the very margin of the pileus. Such discoloured specimens are more reminiscent of equally  
537 discoloured forms of several (but acrid !) species in the *Russula* core clade, rather than of other species  
538 of subsect. *Roseinae*.

539 Microscopic differences between *Russula purpureotincta* and both above-mentioned New Caledonian  
540 species are very subtle. Spore ornamentation in McNabb's species seems less reticulate, its  
541 cheilocystidia more strongly thick-walled, and the contents in hymenial cystidia more abundant.

542

## 543 **Discussion**

544 Subsect. *Roseinae* is sister to subsect. *Lilaceinae* in all recent multigene phylogenies. Both  
545 subsections have always been considered – even in the traditional morphotaxonomic  
546 classifications (Romagnesi, 1967; Sarnari, 2003) – either as one single or as two extremely  
547 close species groups. In older morphology-based classifications, both subsections were part of  
548 subgen. *Incrustatula* Romagnesi (1967) together with other subsections having more coloured  
549 spore prints. In the first multigene phylogeny that was more or less representative of world-  
550 wide *Russula* species, Buyck et al. (2018) demonstrated the artificial concept of subgen.  
551 *Incrustatula* with dark-spored subsect. *Amethystinae* (Romagn.) Bon and *Chamaeleontinae*  
552 Singer of *Russula* subgen. *Incrustatula* being unrelated to the pale-spored taxa in subsect.  
553 *Roseinae* and *Lilaceinae*. This was later confirmed by the same authors in Rossi et al. (2020)  
554 when providing significant, although moderate support to group the northern hemisphere,  
555 dark-spored subsections *Amethystinae* and *Chamaeleontinae*, together with the Oceanian  
556 subsection *Tricholomopsisidum* Buyck & V. Hofst. and the Asian subsect. *Castanopsisidum*  
557 Buyck & X. H. Wang and not with the *Roseinae* – *Lilaceinae* clade.

558         Secotioid or hypogeous *Roseinae* have not yet been reported from the northern  
559 hemisphere. We here place two secotioid southern species in the subsection: *R.*  
560 [*Macowanites*] *kermesina* from New Zealand and *R. albobrunnea* T. Lebel from Australia.  
561 Our ITS phylogeny suggests that these southern secotioid taxa are related to different lineages

562 of northern hemisphere *Roseinae* compared to the agaricoid *Roseinae* from New Caledonia  
563 and New Zealand (Fig. 1).

564 The southern *Roseinae* associate rarely with host trees from family Myrtaceae (so far  
565 only *R. incrustata*) and seem to prefer *Nothofagus* as a host (*R. purpureotincta*, *R. kermesina*,  
566 *R. koniamboensis*, *R. albobrunnea*). It is not clear yet whether these hosts have been more  
567 recently invaded by these fungi or not but, so far, no *Roseinae* have been reported from  
568 *Nothofagus* forests in South America.

569 Arguing that the traditional interpretation of *Roseinae* should be considered at the  
570 section level, Looney et al. (2022) described subsect. *Albidinae* Looney, Manz & Adamčik,  
571 for merely two species (*Russula albida* and one still undescribed species). The same authors  
572 also suggested that a separate subsection was needed for the American /magnarosea clade,  
573 another tiny subclade based so far on two undescribed collections. In our opinion, proposals  
574 to elevate such extremely small entities within terminal clades to higher ranks should be  
575 postponed until more worldwide samplings for the various *Russula* clades become available.

576 Buyck et al. (2018) noticed that many of the southern hemisphere *Russula* have a  
577 pseudoparenchymatic pileipellis structure. This observation was based on the fact that all of  
578 species in the hyperdiverse subsect. *Tricholomopsidum* have a pseudoparenchyma in the  
579 lower suprapellis. The latter feature also applies to all *Roseinae* that are discussed here. It is  
580 yet unclear whether such a pileipellis structure represents an advantage for the involved  
581 species.

## 582 **Acknowledgements**

583 B. Buyck obtained funds for field work in New Caledonia both by ANR (French National  
584 Agency for Research), BIONEOCAL ANR-07-BDIV-006 (PI P. Grandcolas, CNRS-MNHN)  
585 and ULTRABIO ANR-07-BDIV-010 (PI M. Ducouso, CIRAD). Sequencing of the  
586 collections was financed through a 2014 project submitted to the ATM « Emergences » (Dir.  
587 S. Peigné) of the National Natural History Museum in Paris. The first author is also thankful  
588 to the late B. Duhem for the microscopic drawings of the New Caledonian species. Mr. Denis  
589 Poignonec of Koniambo Nickel SAS is thanked for access to the Koniambo Massif mining  
590 area. Mr. David Paulaud of the “Direction de l’Environnement” for Southern Prov. is thanked  
591 for the collecting permits in New Caledonia. E. Horak is grateful for logistic support offered  
592 by the New Zealand Forest Research Institute (Rangiora) and the Herbarium PDD in

593 Auckland. Song acknowledges funding from the Research Initiation Project of Shaanxi  
594 University of Technology (SLGRCQD2214) and the Science and Technology Department of  
595 Shaanxi Province project (2022JQ-199).

596

## 597 **References**

598 Adamčík S. & Buyck B. 2012. — Type-studies in American *Russula* (Russulales, Basidio-  
599 mycota): in and out subsection *Roseinae*. *Nova Hedwigia*. 94(3–4):413–28.

600

601 Buyck B. 1989. — Valeur taxonomique du bleu de crésyl pour le genre *Russula*. *Bulletin de*  
602 *la Société Mycologique de France* 105:1–6.

603

604 Buyck B., Zoller S. & Hofstetter V. 2018. — Walking the thin line... ten years later: the  
605 dilemma of above- versus below-ground features to support phylogenies in the Russulaceae.  
606 *Fungal Diversity* 89(1): 267–292. <https://doi.org/10.1007/s13225-018-0397-5>

607 Cooper J. 2021. — Mycological Notes 28: Notes on the genus *Russula* in New Zealand.

608 Available at <https://www.funnz.org.nz/node/112>

609 Cooper J. & Leonard P. 2014. — Notes on *Russula* in New Zealand. Available at

610 <https://www.funnz.org.nz/sites/default/files/RussulaForBlog.pdf>.

611

612 Das K., Atri N. S. & Buyck B. 2013. — Three new species of *Russula* (Russulales) from  
613 Sikkim (India). *Mycosphere* 4(4): 722–732, Doi 10.5943/mycosphere/4/4/9

614

615 Doyle J. J. & Doyle J. L. 1987. — A rapid DNA isolation procedure for small quantities of  
616 fresh leaf tissue. *Phytochemistry Bulletin* 19: 11–15.

617

618 Hall T. A. 1999. — BioEdit: a user-friendly biological sequence alignment editor and analysis  
619 program for Windows 95/98/NT. *In Nucleic acids symposium series* 41: 95–98.

620

621 Katoh K. & Standley D. M. 2013. — MAFFT Multiple Sequence Alignment Software  
622 Versions 7: Improvement in Performance and Usability. *Molecular Biology and Evolution* 30:  
623 772–780.

624

- 625 Lebel T. & Tonkin J. E. 2007. — Australasian species of *Macowanites* are sequestrate species  
626 of *Russula* (Russulaceae, Basidiomycota). *Australian Systematic Botany* 20:355–381  
627
- 628 Looney B. P., Adamčík S. & Matheny P. B. 2020. — Coalescent-based delimitation and  
629 species-tree estimations reveal Appalachian origin and Neogene diversification in *Russula*  
630 subsection *Roseinae*. *Molecular Phylogenetics and Evolution* 2020; 147:106787.  
631 <https://doi.org/10.1016/j.ympev.2020.106787>  
632
- 633 Looney B.P., Manz C., Matheny B. P. & Adamčík S. 2022. — Systematic revision of the  
634 *Roseinae* clade of *Russula*, with a focus on eastern North American taxa. *Mycologia* 114(2) :  
635 270-302, DOI: 10.1080/00275514.2021.2018881  
636
- 637 Manz C., Adamčík S., Looney B.P., Corrales A., Ovrebo C., Adamčíkova K., Hofmann T. A.,  
638 Hampe F. & Piepenbring M. 2021. — Four new species of *Russula* subsection *Roseinae* from  
639 tropical montane forests in western Panama. *Plos One*. 16(10):e0257616.  
640
- 641 McNabb R. F. R. 1973. — Russulaceae of New Zealand 2. *Russula* Pers. ex SF Gray. *New*  
642 *Zealand Journal of Botany* 11:673–730  
643
- 644 Romagnesi H. 1967. — Les Russules d'Europe et d'Afrique du Nord. Bordas, Paris  
645
- 646 Rossi W, et al. 2020. — Fungal Biodiversity Profiles 91–100. *Cryptogamie Mycologie*.  
647 41(4):69–107.  
648
- 649 Sarnari M. 2003. — Monografia illustrate del genere *Russula* in Europa. Vicenza (Italy):  
650 Tuomo secundo.  
651
- 652 Stamatakis A. 2006. — RAxML-VI-HPC: maximum likelihood based on phylogenetic  
653 analyses with thousands of taxa and mixed models. *Bioinformatics* 22: 2688–2690.  
654
- 655 White T.J., Bruns T., LEE S. & Taylor, J. 1990. — Amplification and direct sequencing of  
656 fungal ribosomal RNA genes for phylogenetics. *PCR protocols: a guide to methods and*  
657 *applications* 18: 315–322.  
658

659 **Figure legends**

660

661
